1 **Obesity causes irreversible mitochondria failure in visceral adipose tissue**  
2 **despite successful anti-obesogenic lifestyle-based interventions**

3

4 **Authors:**

5 Alba Gonzalez-Franquesa\*‡<sup>1,2</sup>, Pau Gama-Perez‡<sup>1</sup>, Marta Kulis<sup>3</sup>, Norma Dahdah<sup>1</sup>,  
6 Sonia Moreno-Gomez<sup>1</sup>, Ana Latorre-Pellicer<sup>4,5</sup>, Rebeca Fernández-Ruiz<sup>6,7</sup>, Antoni  
7 Aguilar-Mogas<sup>8</sup>, Erika Monelli<sup>9</sup>, Sara Samino<sup>7,10</sup>, Joan Miró<sup>7,10</sup>, Gregor Oemer<sup>11</sup>,  
8 Xavier Duran<sup>7,12</sup>, Estrella Sanchez-Rebordelo<sup>13</sup>, Marc Schneeberger<sup>6,14</sup>, Merce  
9 Obach<sup>6</sup>, Joel Montane<sup>6,15</sup>, Giancarlo Castellano<sup>3</sup>, Vicente Chapaprieta<sup>3</sup>, Lourdes  
10 Navarro<sup>1</sup>, Ignacio Prieto<sup>16</sup>, Carlos Castaño<sup>6</sup>, Anna Novials<sup>6,7</sup>, Ramon Gomis<sup>6,7</sup>, Maria  
11 Monsalve<sup>16</sup>, Marc Claret<sup>7,17</sup>, Mariona Graupera<sup>9</sup>, Guadalupe Soria<sup>18</sup>, Joan  
12 Vendrell<sup>7,12</sup>, Sonia Fernandez-Veledo<sup>7,12</sup>, Jose Antonio Enríquez<sup>19</sup>, Angel  
13 Carracedo<sup>4,20</sup>, José Carlos Perales<sup>1,21</sup>, Rubén Nogueiras<sup>13,22</sup>, Laura Herrero<sup>22,23</sup>,  
14 Markus A. Keller<sup>11</sup>, Oscar Yanes<sup>7,10</sup>, Marta Sales-Pardo<sup>8</sup>, Roger Guimerà<sup>8,24</sup>, José  
15 Ignacio Martín-Subero<sup>3,24,25</sup>, Pablo M. Garcia-Roves\*<sup>1,21</sup>

16

17 **Affiliations:**

18 <sup>1</sup>Department of Physiological Sciences, Universitat de Barcelona, 08907 Barcelona,  
19 Spain. <sup>2</sup>Novo Nordisk Foundation Center for Basic Metabolic Research, University  
20 of Copenhagen, Denmark. <sup>3</sup>Biomedical Epigenomics Group, Institut d'Investigacions  
21 Biomèdiques August Pi i Sunyer (IDIBAPS), 08036 Barcelona, Spain. <sup>4</sup>Grupo de  
22 Medicina Xenómica, CIBERER, Centre for Research in Molecular Medicine and

23 Chronic Diseases (CIMUS), Universidade de Santiago de Compostela, 15782  
24 Santiago de Compostela, Spain. <sup>5</sup>Unit of Clinical Genetics and Functional Genomics,  
25 Department of Pharmacology-Physiology, School of Medicine, University of  
26 Zaragoza, CIBERER-GCV02 and ISS-Aragon, 50009 Zaragoza, Spain. <sup>6</sup>Diabetes  
27 and Obesity Research Laboratory, Institut d'Investigacions Biomèdiques August Pi i  
28 Sunyer (IDIBAPS), 08036 Barcelona, Spain. <sup>7</sup>Centro de Investigación Biomédica en  
29 Red Diabetes y Enfermedades Metabólicas Asociadas (CIBERDEM), 28029 Madrid,  
30 Spain. <sup>8</sup>Department of Chemical Engineering, Universitat Rovira i Virgili, 43007  
31 Tarragona, Spain. <sup>9</sup>Vascular Signalling Laboratory, Program Against Cancer  
32 Therapeutic Resistance (ProCURE), Institut d'Investigació Biomèdica de Bellvitge  
33 (IDIBELL), 08907 Barcelona, Spain. <sup>10</sup>Metabolomics Platform, IISPV, Department of  
34 Electronic Engineering, Universitat Rovira i Virgili, 43007 Tarragona, Spain.  
35 <sup>11</sup>Institute of Human Genetics, Medical University of Innsbruck, 6020 Innsbruck,  
36 Austria. <sup>12</sup>Institut d'Investigació Sanitària Pere Virgili (IISPV), 43204 Reus, Spain.  
37 <sup>13</sup>Department of Physiology, CIMUS, Universidad de Santiago de Compostela,  
38 15782 Santiago de Compostela, Spain. <sup>14</sup>Laboratory of Molecular Genetics, Howard  
39 Hughes Medical Institute, The Rockefeller University, NY10065 New York, USA.  
40 <sup>15</sup>Blanquerna School of Health Science, Ramon Llull University, Barcelona, Spain.  
41 <sup>16</sup>Instituto de Investigaciones Biomédicas Alberto Sols (CSIC-UAM), 28029 Madrid,  
42 Spain. <sup>17</sup>Neuronal Control of Metabolism Laboratory, Institut d'Investigacions  
43 Biomèdiques August Pi i Sunyer (IDIBAPS), 08036 Barcelona, Spain.  
44 <sup>18</sup>Experimental 7T MRI Unit, Institut d'Investigacions Biomèdiques August Pi i  
45 Sunyer (IDIBAPS), Barcelona, Spain. <sup>19</sup>Centro Nacional de Investigaciones  
46 Cardiovasculares Carlos III, Madrid, Spain; CIBERFES, 28029 Madrid, Spain.

47 <sup>20</sup>Fundación Pública Galega de Medicina Xenómica, SERGAS, Instituto de  
48 Investigación Sanitaria de Santiago de Compostela (IDIS), Santiago de Compostela,  
49 Spain. <sup>21</sup>Nutrition, Metabolism and Gene therapy Group; Diabetes and Metabolism  
50 Program; Institut d'Investigació Biomèdica de Bellvitge (IDIBELL), Barcelona, Spain.  
51 <sup>22</sup>Centro de Investigación Biomédica en Red Fisiopatología de la Obesidad y la  
52 Nutrición (CIBEROBN), Instituto de Salud Carlos III, 28029 Madrid, Spain.  
53 <sup>23</sup>Department of Biochemistry and Physiology, School of Pharmacy and Food  
54 Sciences, Institut de Biomedicina de la Universitat de Barcelona (IBUB), Universitat  
55 de Barcelona, 08028 Barcelona, Spain. <sup>24</sup>Institució Catalana de Recerca i Estudis  
56 Avançats (ICREA), 08010 Barcelona, Spain. <sup>25</sup>Department of Basic Clinical Practice,  
57 Universitat de Barcelona, 08036 Barcelona, Spain.

58

59 \*Correspondence: [albagf@sund.ku.dk](mailto:albagf@sund.ku.dk) and [pgarciaroves@ub.edu](mailto:pgarciaroves@ub.edu)

60 ‡ These authors contributed equally

61

62

63

64

65 **Abstract**

66 Metabolic plasticity is the ability of a biological system to adapt its metabolic  
67 phenotype to different environmental stressors. We used a whole-body and tissue-  
68 specific phenotypic, functional, metabolomic and transcriptomic approach to  
69 systematically assess metabolic plasticity in diet-induced obese mice after a  
70 combined nutritional and exercise intervention. Although most pathological features  
71 were successfully reverted, we observed a high degree of metabolic dysfunction  
72 irreversibility in visceral white adipose tissue, characterised by abnormal  
73 mitochondrial morphology and functionality. Despite two sequential therapeutic  
74 interventions and apparent global phenotypic recovery, obesity specifically triggered  
75 in visceral adipose a cascade of events progressing from mitochondrial metabolic  
76 and proteostatic defects to widespread cellular stress, which compromises its  
77 biosynthetic and recycling capacity. Our data indicate that obesity prompts a lasting  
78 metabolic fingerprint that leads to a progressive breakdown of metabolic plasticity in  
79 white adipose tissue, becoming a significant milestone in disease progression.

80

81 **Keywords:** Obesity, metabolic plasticity, visceral adipose tissue, mitochondrial  
82 dysfunction, exercise, caloric restriction, multi-organic approach, lifestyle  
83 intervention, aging-like phenotype, metabolic fingerprint.

84

85

86

87 **Main text:**

88 **Introduction**

89 Food availability, consumption surplus and sedentarism, predominant in most parts  
90 of the modern world, are the most significant environmental challenges that western  
91 societies are facing nowadays. According to the World Health Organization (WHO),  
92 in 2016, 650 million adults were suffering from obesity, with a growing incidence that  
93 had become a significant concern in healthcare (1). Moreover, obesity increases the  
94 risk for most common non-communicable diseases, including neurodegenerative and  
95 cardio-vascular diseases, cancer and type 2 diabetes (T2D). Tackling the biology  
96 underlying obesity-related TD2 is a challenge, as it is a multi-organic disease, from  
97 both pathological and etiological perspectives. Surgical, pharmacological and  
98 lifestyle-based interventions partially revert the obesity phenotype, although thwarted  
99 by their failure to sustain body weight loss and health benefits and frequent relapses  
100 (2-4). This failure to reverse obesity suggests that cellular and metabolic plasticity,  
101 interpreted as the ability of the cells to change and efficiently adapt their phenotypes  
102 to specific environmental cues, may be impaired. This phenomenon takes place in  
103 chronic conditions and diseases as well as in ageing, but whether obesity disrupts  
104 metabolic plasticity, notwithstanding therapeutic interventions, is still a conundrum.

105 In this context, the LiMa (Lifestyle Matters) project uses a comprehensive therapeutic  
106 approach focused on the systemic and tissue-specific impact of important  
107 environmental stressors (namely chronic overfeeding and physical inactivity). Our  
108 goal is to elucidate the reversibility and improvement of metabolic plasticity achieved  
109 by lifestyle interventions on the pathological changes in different organs caused by

110 obesity and insulin resistance. Here, we present an integrative multi-tiered approach  
111 to study the impact of lifestyle interventions on obesity, and reveal that obesity  
112 triggers a progressive breakdown of metabolic plasticity in white adipose tissue which  
113 is irreversible despite apparent phenotypic reversion.

114

## 115 **Results**

### 116 **Combined nutritional and exercise intervention reverses HFD-induced** 117 **phenotype**

118 We investigated how reversible is diet-induced obesity through lifestyle intervention.  
119 Three experimental groups were defined: control group (Ctrl); HFD-induced obese  
120 and insulin-resistant group (HFD); and a third group (Int) which, included a nutritional  
121 and exercise intervention: specifically, a calorie restriction diet substitution (with poly-  
122 and mono-unsaturated rich oils and complex carbohydrates instead of saturated fats  
123 and simple sugars) combined with treadmill training, (*see methods section for*  
124 *detailed group description*). HFD group showed increased body weight (Figure 1A)  
125 by expanded fat volume (Figures 1B and 1C). Also, HFD mice showed increased  
126 triglyceride content in liver and soleus skeletal muscle (Figure 1D), along with  
127 disrupted metabolic flexibility (Figures 1E and 1F) and impaired glucose metabolism  
128 (Figures 1G-H) in comparison to the control group (Ctrl group). Glucose metabolism  
129 impairment was due to insulin resistance (Figure S1A) and pancreatic dysfunction  
130 evident by increased pancreas size, impaired glucose-stimulated insulin secretion,

131 both *in vivo* and *in vitro* (Figures 1H-L) and increased  $\beta$  cell mass (Figures 1K-L,  
132 Figure S1B).

133 Combined nutritional and exercise intervention (Int group) reversed the observed  
134 pathophysiology (Figures 1A-J) except for persistent hyperinsulinemia (both fasting  
135 and after glucose stimulation) (Figure 1H), consistent with the maintained increase in  
136  $\beta$  cell mass after the intervention (Figures 1K-L, Figure S1B), even though *in vitro*  
137 GSIS was fully recovered (Figure 1J). Altogether these results validated our diet-  
138 induced obesity animal model and efficiency of the combined nutritional and exercise  
139 intervention to revert obesity and partially the T2D phenotype.

140

#### 141 **Tissue-specific pathological consequences of obesity and recovery after** 142 **combined nutritional and exercise intervention**

143 Next, we assessed the tissue-specific effect of the combined intervention on  
144 metabolic plasticity. We used a three-tiered approach to elucidate the  
145 pathophysiological impact of obesity-related insulin resistance in skeletal muscle,  
146 liver, WAT, and hypothalamus. Specifically, this approach consisted of evaluating  
147 mitochondrial respiration states (Mito); targeted expression profiles of genes related  
148 to glucose and fatty acid metabolism, mitochondrial biogenesis, function, and stress  
149 (Genes); and analysis of metabolites (Mets) (Figure 2A, Figures S2A-B and Suppl.  
150 Table 1), investigating them in the tissues mentioned above and screening for the  
151 presence or absence of reversibility.

152

153 Limited changes were observed in hypothalamus regardless of HFD-feeding or  
154 intervention status. The intervention induced significant changes in glycolytic skeletal  
155 muscle (tibialis anterior), consistent with the switch to an oxidative phenotype  
156 promoted by the implementation of the exercise program. Mice on HFD-feeding  
157 induced substantial metabolic changes (combined green and red bars) in oxidative  
158 skeletal muscle (soleus). Of note, most of these metabolic changes were reverted  
159 across the different tiers in muscle after the intervention (green bars). Liver and  
160 epididymal WAT (eWAT) however, suffered profound metabolic changes upon HFD-  
161 feeding (combined green and red bars) and even though the whole body improved  
162 metabolic phenotype, these two tissues specifically exhibited sparse or non-reversion  
163 (red bars) in all three phenotypical tiers (Figure 2A). To further assess the irreversible  
164 loss of metabolic plasticity, we performed next-generation RNA sequencing (RNA-  
165 seq) in liver and eWAT before and after the intervention. Differential expression  
166 analysis revealed that, upon HFD-feeding, eWAT transcriptome was much more  
167 perturbed than the liver transcriptome (7,451 vs 285 genes, respectively) (Figure 2B)  
168 and that upon intervention, the eWAT transcriptome exhibited a lesser degree of  
169 reversion (66% as compared to 94% in the liver) (Figures 2C and 2D).

170 Collectively, these results argued for a tissue-specific heterogeneous susceptibility to  
171 obesity-induced defects in metabolic plasticity, and that eWAT specifically showed  
172 the highest degree of irreversibility after a combined nutritional and exercise  
173 intervention.

174

175



## 176 **Incomplete remodeling of eWAT after the combined intervention**

177 To further characterise the changes accounting for obesity-related metabolic  
178 irreversibility in eWAT, we studied the transcriptome. We identified downregulated  
179 (Figure 3A) and upregulated genes (Figure 3G) after HFD-feeding. Within the 3,869  
180 downregulated genes, 1,036 recovered, 1,464 partially recovered, and 1,369  
181 remained downregulated after the intervention (Figure 3A). Gene ontology  
182 enrichment analysis showed that non-reverted transcripts were related to biological  
183 processes such as biosynthesis, metabolism, and mitochondrial morphogenesis,  
184 organisation and transport (Figure 3B). In line with this, enrichment for cellular  
185 components identified genes involved in mitochondrial inner membrane (Figure S3A).  
186 Mitochondrial inner membrane is structured in *cristae*, whose density was significantly  
187 reduced after HFD-feeding and, unexpectedly, further decreased after the  
188 intervention (Figure 3C-D, Figure S3B). Decrease in cristae density was observed  
189 irrespective of maintenance of mitochondrial aspect ratio (Figure S3C). Additionally,  
190 processing of OPA1, a protein located in the inner mitochondrial membrane and  
191 master regulator of cristae architecture, revealed the same irreversible decrease after  
192 obesity and the intervention (Figure 3E). High-resolution respirometry studies in  
193 permeabilised eWAT confirmed the functional relevance of defects in cristae density  
194 revealing decreased respiratory capacity (Figure 3F).

195 From the 3,582 differentially upregulated genes after HFD-feeding (Figure 3G), 1,064  
196 achieved a complete reversion, 1,389 were partially reverted and 1,129 transcripts  
197 did not change after the intervention. Gene ontology enrichment analysis of these  
198 non-reverted transcripts revealed biological processes associated with the immune

199 system and defense response (Figure 3H). To further validate these findings, we  
200 studied tissue immune infiltration in eWAT. The histological analysis revealed  
201 hypertrophied adipocytes surrounded by crown-like structures (composed by immune  
202 cells) in the HFD group (Figure 3J). Lastly, despite the improved systemic metabolic  
203 phenotype and the reduction of adipose tissue weight promoted by the intervention  
204 (Figure 3I), the histology of eWAT in these animals revealed a persistent alteration  
205 with the presence of dead adipocytes and massive immune cell infiltration (Figure  
206 3J). These findings were corroborated by an increase in Caspase3- and Mac2-  
207 positive cells (Figure 4D, middle and lower panel, Figure S4C), markers of apoptosis  
208 and macrophages, respectively. Altogether, these results suggested an active eWAT  
209 remodeling after the intervention, potentially explaining the observed metabolic  
210 derangements.

211

### 212 **Mitochondrial dysregulation persists in morphologically remodeled eWAT**

213 The negative energy balance induced by exercise and nutritional intervention allowed  
214 for a global metabolic phenotypical recovery except for the increased pancreatic islets  
215 size (Figures 1K and 4A) and eWAT mitochondria dysfunction and immune cells  
216 infiltration (Figures 3 and 4A). After the partial achievements of sustained weight loss  
217 and improved physical fitness, we hypothesised that it would be necessary an  
218 extended milder intervention to recover the eWAT and pancreatic islets completely.  
219 Therefore, in a separate group of mice, we conducted an extra five weeks intervention  
220 following the same diet but undergoing pair-feeding and a less intense training  
221 program aiming at bodyweight maintenance (Figure 4A).

222 After this second phase of the intervention (Int2 group) (Figure S4A) the body weight  
223 was maintained, and glucose tolerance was comparable to the Int group (Figure  
224 S4B). Furthermore, the second intervention successfully decreased fasting insulin  
225 and glucose-stimulated insulin levels (Figure 4B) in line with reduced  $\beta$  cell mass  
226 (Figure 4C). The second intervention also improved eWAT atrophy and immune cell  
227 infiltration (Figure 4D, upper panel), along with a progressive reduction of Caspase3-  
228 and Mac2-positive cells (Figure 4D, middle and lower panel, and Figure S4C).

229 Adipose tissue expansion negatively influences tissue remodeling and functionality  
230 by limiting oxygen and nutrient supply to adipocytes. Oxygen limitation triggers an  
231 increase in succinate levels, which stabilises and activates HIF1- $\alpha$ , a master regulator  
232 of the cellular response to hypoxia and angiogenesis. Thus, we next examined  
233 whether the intervention had remodeled vascularisation parameters in eWAT.  
234 Unexpectedly, confocal microscopy studies revealed enhanced eWAT  
235 vascularisation after both interventions (Figures 4E and 4F). Also, analysis of critical  
236 mediators of angiogenesis in the Int2 group, revealed normalisation of *Hif1 $\alpha$*  gene  
237 expression (Figure 4G), *Vegf $\alpha$*  and *Vegfr* gene expression (Figure S4D and S4E),  
238 and reduced levels of succinate (Figure 4H).

239 Additionally, we evaluated whether this eWAT morphological recovery after the  
240 second intervention was accompanied by reversion of gene expression patterns by  
241 RNA-seq. Specifically, out of the 1,129 transcripts upregulated after HFD and Int  
242 (Figure 3G), 82% had reverted to Ctrl values after Int2 (Figure 4I). Gene ontology  
243 analysis of these genes that recovered their expression revealed enrichment in  
244 biological processes linked to organelle and cytoskeleton organisation, immune

245 system, and inflammatory and defense response (Figure 4J and 4K). Besides that,  
246 from the 1,369 transcripts downregulated after HFD and Int (Figure 3A), 49% were  
247 recovered after Int2 while 51% still remained downregulated (Figure 4I). Gene  
248 ontology of the set of genes that were unable to restore their levels, showed, again,  
249 a significant enrichment in mitochondrial-related biological processes, such as  
250 electron transport chain, energy metabolism, biosynthesis, and mitochondrial  
251 organisation and transport (Figures 4O and 4P). Consistent with this result,  
252 mitochondrial respiratory capacity remained reduced after the second intervention  
253 (Figure 4Q). Altogether, these results demonstrate that metabolic and mitochondrial  
254 derangements in eWAT were resilient, and persisted even after resolution of  
255 morphological remodeling of the tissue, arguing for defects in mitochondria to be the  
256 main determinants of metabolic plasticity breakdown in eWAT.

257

### 258 **Enduring mitochondrial derangements as a driver of WAT metabolic plasticity** 259 **breakdown**

260 Next, we speculated that additional transcriptional changes cascading downstream  
261 the HFD-induced phenotype during the interventions might help understand the  
262 observed metabolic scenario.

263 Three clusters were clearly defined amongst the genes irreversibly downregulated  
264 across the experimental groups: i) 893 genes irreversibly decreased with HFD-  
265 feeding (Figure 5A, Cluster A), ii) 601 genes irreversibly decreased from Int (Cluster  
266 B) and, iii) 678 genes with partially reduced expression in Int that became significantly

267 downregulated only after Int2 (Cluster C). Gene ontology revealed biological  
268 processes and cellular components enriched in these three clusters (Figures 5B-C).  
269 Genes irreversibly downregulated since the onset of diet-induced obesity and insulin  
270 resistance (Cluster A) related to metabolic and biosynthetic processes at the  
271 mitochondria and peroxisome level. Additionally, several other biological processes  
272 enriched in Cluster A, such as lipid metabolism, adipocyte differentiation or apoptosis,  
273 were further amplified in gene number size after the interventions (Clusters B and C,  
274 inner circles). Genes downregulated after the first intervention (Cluster B) were also  
275 related to additional processes such as RNA and glucose metabolism; protein folding  
276 and transport to Golgi and mitochondria, as well as mitochondrial organisation. Of  
277 significant relevance is the fact that previously downregulated genes were still  
278 affected or further amplified even after the second intervention (Cluster C). Also,  
279 genes from Cluster C showed new significant enrichments, such as in mitochondrial  
280 organisation, proteasome complex and ribosomal biogenesis. Hence, these findings  
281 indicate the irreversible course towards failure of transcriptional changes even after  
282 reversal of the diet-induced obese and insulin resistant phenotype during the  
283 sequential interventions. These changes lead to a progressive deterioration of eWAT  
284 functionality and pointed to the mitochondria as the primary organelle affected,  
285 triggering further transcriptional changes of genes involved in Golgi apparatus and  
286 Endoplasmic Reticulum (Figure 5C).

287 In agreement with the alterations in the inner mitochondrial membrane,  
288 cardiolipidomic analysis revealed that both HFD and Int2 group had decreased  
289 monolysocardiolipin (MLCL) relative abundance, even when total cardiolipin (CL)

290 levels were already recovered (Figures 5D and 5E). Low MLCL levels likely indicate  
291 decreased cardiolipin remodeling rates as reported by CL deacylation-reacylation  
292 cycle genes being downregulated (i.e., *Pla2g6*, *Hsd17b10* and *Lpgat1*) or slightly  
293 increased (i.e., *Lclat1*) (Figures 5F-I). Also, a substantial reduction in mitochondrial  
294 DNA (mtDNA) copy number in eWAT (Figure 5M) supported previous findings and  
295 strengthened mitochondrial derangements as a critical component in WAT metabolic  
296 plasticity breakdown. Of note, other adipose depots such as subcutaneous WAT  
297 (scWAT, Figure 5J), liver (Figure 5K) and skeletal muscle gastrocnemius showed no  
298 changes in mtDNA (Figure 5L).

299 Finally, to identify the potential trigger of mtDNA reduction, we evaluated additional  
300 experimental groups in different dietary regimes aimed to overcome obesity.  
301 Intriguingly, all animals subjected to HFD-feeding also presented a decrease in  
302 mtDNA copy number regardless of the downstream intervention (namely intermittent  
303 fasting or switch to chow diet) (Figure 5M). On the contrary, such reduction was not  
304 observed in animals that were not previously obese but followed the same dietary  
305 regime (Figure 5M), suggesting that the stress induced by HFD could trigger a  
306 permanent damage. Collectively, our results reveal that phenotypically healthy mice  
307 after reversal of obesity show tissue-specific breakdown of metabolic plasticity, and  
308 highlight eWAT as the primary target. This breakdown is primarily characterised by a  
309 sequential and unresolved mitochondrial deterioration, further aggravating other  
310 cellular functions even after combined exercise and nutritional interventions.

311

312

## 313 **Discussion**

314 Obesity-related T2D is a chronic and degenerative disease that involves the interplay  
315 amongst and failure of several organs and tissues at both its onset and progression.  
316 This level of complexity requires a multidisciplinary and integrative experimental  
317 approach to capture interorgan communication and elucidate the vulnerability and  
318 resilience of organs leading to a global metabolic failure (5, 6). Thus, the current  
319 study uses a multidisciplinary and multi-organ approach to analyse an experimental  
320 combined intervention that proved to be successful in recovering nearly all  
321 phenotypical metabolic alterations in a diet-induced obese animal model. This  
322 animal model resembles the early stages of human obesity-related T2D pathology  
323 (7, 8). Moreover, this study provides valuable information in that it shows that lifestyle  
324 interventions are powerful treatments to overcome obesity and associated  
325 comorbidities. In addition, it allows for assessment of not only the phenotypic impact  
326 of HFD, but also how its metabolic fingerprint affects different tissues.

327 Our approach identifies the visceral WAT as the most affected tissue with metabolic  
328 derangements in obesity defined by its irreversible loss of functional plasticity despite  
329 apparently successful therapeutic interventions. An in-depth analysis of the global  
330 transcriptome in eWAT from obese mice reveals a generalised downregulation of  
331 metabolic processes mainly affecting mitochondria, and particularly its inner  
332 membrane and oxidative phosphorylation system (9, 10). The negative impact of  
333 chronic overfeeding in WAT mitochondria and how defective mitochondria  
334 performance influence WAT functionality has been extensively studied (11-13). The  
335 critical observation and novel finding here is that a combined nutritional and exercise

336 intervention, powerful to reverse obesity systemically and improve tissue-specifically  
337 into a healthy phenotype, leads to a long-lasting obesity-related mitochondrial  
338 deterioration in visceral WAT that becomes irreversible.

339 To elucidate whether this deterioration was due to an intrinsic mitochondrial defect  
340 or a consequence of a loss of tissue plasticity, we studied additional functional  
341 parameters. A considerable amount of evidence supports the requirement of an  
342 optimised degree of WAT expandability to preserve whole body homeostasis when  
343 faced with energy surplus challenges (14). Factors such as early angiogenesis and  
344 inflammation in response to mild tissue hypoxia are critical requirements for a  
345 healthy WAT expansion (15, 16). However, the chronicity of metabolic overload  
346 stress promoted by extended overfeeding periods can compromise tissue plasticity,  
347 creating a maladaptive response characterised by persistent oxidative damage,  
348 inadequate angiogenic response, severe hypoxia, adipocyte death, immune  
349 infiltration and fibrosis (17). Although these pathogenic events have been described,  
350 the mechanisms involved in the remodeling during the shrinkage promoted by weight  
351 loss remains controversial (18-23). On this respect, we observed evidence of  
352 hypoxia (namely accumulation of succinate levels and *Hif1- $\alpha$*  overexpression) in  
353 WAT of obese mice, without a parallel VEGF-mediated proper vascularisation, as  
354 well as marked dystrophy-like tissue architecture after weight loss. This suggests an  
355 evident defect in the remodeling mechanisms of adipose tissue. By implementing  
356 the second phase of intervention with maintenance of low body weight, all these  
357 parameters were normalised, thus indicating the completion of the remodeling  
358 process. Nonetheless, despite such improvements in tissue architecture and



359 vascularisation, mitochondrial defects were still present both at a transcriptional and  
360 functional level. Altogether, these results reinforce the novel finding of a permanent  
361 intrinsic mitochondrial damage in eWAT regardless of the tissue remodeling capacity  
362 (tissue plasticity).

363 The magnitude and specificity of the mtDNA reduction observed in eWAT amongst  
364 different experimental groups and tissues is a robust indicative sign of severe  
365 mitochondrial disturbances at the tissue specific-level and points at HFD-feeding as  
366 the driving force for such mitochondrial deterioration. Identification of the causative  
367 mechanisms leading to this irreversible structural, functional and transcriptional  
368 mitochondrial damage is challenging, due to the multifactorial components occurring  
369 under physiological conditions. Nonetheless, our findings reveal a series of events  
370 leading to mitochondrial damage and impaired tissue metabolic plasticity. It is well  
371 established that proper fine-tuning between mitochondrial biogenesis and recycling  
372 mediated by quality-control mechanisms is essential to ensure optimal functionality  
373 (24). However, critical perturbations in mitochondrial quality control could potentially  
374 cause cellular dysfunction involving protein import deficiencies and leading to  
375 cellular proteostatic defects and an ageing phenotype (25). In line with this, a recent  
376 paper by Yu *et al* demonstrated how, in the context of obesity, a disrupted protein  
377 import machinery in adipocytes is related to mitochondrial malfunction (26).  
378 Accordingly, the in-depth Gene Ontology analysis performed at different time-points  
379 shows that the downregulation of metabolic processes, initially confined to  
380 mitochondria, is spread to biological processes related to protein transport and  
381 folding, affecting other cellular compartments such as Golgi, Endoplasmic Reticulum

382 and the ubiquitin and proteasome system. Overall, these data are indicative of the  
383 spreading of original mitochondrial stress to other structures and processes,  
384 worsening global cellular stress and the ability to degrade and recycle damaged  
385 proteins or organelles. This finding is especially relevant in the context of a healthy  
386 phenotype at a systemic level after the intervention, in which HFD seems to trigger  
387 irreversible oxidative damage in eWAT that ultimately progresses and causes the  
388 breakdown of metabolic plasticity.

389 A reduced capacity to degrade or recycle cellular components could answer one of  
390 the most interesting questions arising from our results: why are such disrupted  
391 mitochondria still present in this tissue and not targeted for recycling through  
392 mitophagy processes? The observed defective cardiolipin remodeling adds insight  
393 in that direction. Indeed, cardiolipin remodeling plays a critical role in the link  
394 between oxidative stress (e.g. ROS) and mitochondrial dysfunction in different  
395 metabolic tissues (27). Under physiological conditions, this remodeling process links  
396 mitochondrial cardiolipin architecture to the phospholipid environment of the cell by  
397 a tissue-independent specificity mechanism that is not primarily controlled via gene  
398 expression (28). However, this holds as long as none of the essential components  
399 for cardiolipin remodeling becomes rate-limiting. In this respect, lysocardiolipin  
400 acyltransferase 1 (LCLAT1) has been suggested as a pivotal enzyme involved in the  
401 pathological remodeling of cardiolipin in various age-related pathological conditions  
402 including diet-induced obesity and T2D. Thus, LCLAT1 expression tendency to  
403 increase aggravates the vicious cycle among mitochondrial dysfunction, ROS  
404 damage, and defects in mitochondrial recycling capacity (29-31). Therefore, the

405 combination of different data sets not only evidences a deficiency in cristae formation  
406 but also suggests a defective clearance of dysfunctional mitochondria as a plausible  
407 explanation for this loss of metabolic plasticity.

408 In line with our findings, Hahn *et al* recently reported that, before any other tissue,  
409 WAT of mice fed ad libitum exhibited significant age-related effects at a transcriptional  
410 level (32). The study also identified a WAT-specific nutritional memory that impeded  
411 its metabolic reprogramming when switched to calorie restriction. Although this study  
412 was focused in late-life calorie restriction and longevity in mice, it revealed an ageing  
413 phenomenon that shares similarities with the disease-oriented approach in our  
414 research (namely diet-induced obesity). Altogether, we hypothesise that the stress  
415 promoted by HFD might hasten adipocytes to enter in a premature ageing-like state  
416 triggered by subsequent mitochondrial dysfunction, unsuccessful mitoprotein-  
417 induced stress response and compromised cellular renewal capacity. Overall, all  
418 these events agree with age-related processes reported in other chronic  
419 degenerative diseases (33, 34).

420 To summarise, we demonstrate that nutritional and exercise interventions,  
421 resembling a healthy lifestyle in humans, can revert a diet-induced obese and insulin  
422 resistant phenotype in mice. However, the broad spectrum of data layers, studied  
423 tissues and phenotypical characterisation performed in this study indicates a  
424 hierarchy in the way organs are vulnerable and resilient. In this sense, it reveals a  
425 metabolic plasticity breakdown in white adipose tissue. Thus, mitochondrial  
426 deterioration in visceral WAT suggests an initial and critical point of no return in  
427 metabolic disease progression, and therefore a relevant target for prevention and

428 early treatment. In the context of obesity, trigger of these processes could be  
429 therefore avoided by implementing and advocating for early lifestyle interventions in  
430 individuals at risk.

431

## 432 **Acknowledgements**

433 This work has been supported by Ministerio de Ciencia e Innovación (MICINN) Grant  
434 BFU2011- 24679 (P.M.G.-R.); Instituto de Salud Carlos III (ISCIII) Grant PI15/00701  
435 (P.M.G.-R.) cofinanced by the European Regional Development Fund “A way to  
436 build Europe”; Government of Catalonia Suport Grups de Recerca AGAUR 2017-  
437 SGR-204 (to J.C.P. and P.M.G.-R.), 2017-SGR-736 (to J.I.M.-S.) and 2017-SGR-896  
438 (to A.A.-M., M.S.-P., and R.G.). M.M. was recipient of a MINECO grant RTI2018-  
439 093864-B-I00. M.A.K. was funded by a Medical University of Innsbruck Start Grant.  
440 M.C. was funded by the European Research Council (ERC) under the European  
441 Union’s Horizon 2020 research and innovation programme (grant agreement  
442 725004). L. H. was funded by MINECO grants SAF2013-45887-R, SAF2017-83813-  
443 C3-1-R (granted to Dolors Serra (DS) and L.H.), co-funded by the European  
444 Regional Development Fund, the Centro de Investigación Biomédica en Red de  
445 Fisiopatología de la Obesidad y la Nutrición (CIBEROBN) (Grant CB06/03/0001 to  
446 DS), the Government of Catalonia (2017SGR278 to DS), the Fundació La Marató  
447 de TV3 (201627-30 to DS), the European Foundation for the Study of Diabetes  
448 (EFSD)/Janssen-Rising Star and L’Oréal-UNESCO “For Women in Science”  
449 research fellowships. P.M.G.-R. was a recipient of a Ramon y Cajal contract (RYC-  
450 2009-05158) from MICINN. A.G-F. was a recipient of “Beca de Formació de

451 Personal Investigador de l'IDIBAPS" fellowship and she is currently supported by an  
452 unconditional donation from the Novo Nordisk Foundation (NNF) to NNF Center for  
453 Basic Metabolic Research (NNF18CC0034900). P.G-P. was a recipient of  
454 predoctoral fellowship from the Universitat de Barcelona (APIF-UB). E.S-R. was  
455 recipient of a predoctoral fellowship from Ministerio de Economia y Empresa  
456 (MINECO) grant BES-2013-062796. This work was partially developed at the Esther  
457 Koplowitz Centre (CEK, Barcelona, Spain).

458

#### 459 **Competing interests**

460 The authors declare no competing interests.

461

#### 462 **Figure legends**

463 **Figure 1. HFD- and combined intervention-induced phenotype.** A: Body weight  
464 for control (Ctrl, n=80), high fat diet-fed (HFD, n=70) and intervention (Int, n=46)  
465 groups. B: Quantification of fat volume by NMR imaging and 7Teslas scan  
466 representative images per phenotype (Ctrl n=4; HFD n=4; Int n=3). C: NMR  
467 representative images for each group for quantification in (B). D: Triglycerides (TG)  
468 levels in liver: Ctrl (n=8), HFD (n=7) and Int (n= 8); and soleus: Ctrl (n= 9), HFD (n=  
469 8) and Int (n=8). E: Group-averaged respiratory exchange ratio (RER) deviation from  
470 the 24h median for each animal for Ctrl (n=11), HFD (n=10) and Int (n=6) for 48h in  
471 metabolic cages. F: Minimum and maximal values of deviation from median (RER  
472 variation, Figure E). G: Intraperitoneal glucose tolerance test (IGTT) for Ctrl (n=54),

473 HFD (n=48) and Int (n=12). H: Basal (t=0min) and 15min insulin levels during IGTT  
474 (Figure G) for Ctrl (n=15), HFD (n=19) and Int (n=13). I: Pancreas mean tissue  
475 weight for Ctrl (n=6), HFD (n=6) and Int (n=4). J: Glucose-stimulated (2.8 and  
476 16.7mM) insulin secretion *in vitro* for pancreatic islets from animals in groups Ctrl  
477 (n=10), HFD (n=7) and Int (n=7). K: Immunohistochemistry representative images of  
478 pancreatic islets (nuclei-blue, insulin-red, glucagon-green) from animals in Ctrl, HFD  
479 and Int. L: Normalized pancreatic islet insulin area by pancreas section area for Ctrl  
480 (n=6), HFD (n=6) and Int (n=4). Ctrl: control; HFD: high fat diet-fed; Int: intervention.  
481 Data represented as mean  $\pm$  SEM, ANOVA One-way and Post-hoc Tukey, \*p<0.05,  
482 \*\*p<0.01, \*\*\*p<0.001, and \*\*\*\*p<0.0001.

483

484 **Figure 2. Tissue-specific effects of HFD-feeding and nutritional and exercise**  
485 **intervention.** A: Schematic overview of the main processes taking place in tissues  
486 involved in obesity-related insulin resistance. Boxes highlight tissues analysed in this  
487 study (skeletal muscle, hypothalamus, liver and epididymal white adipose tissue,  
488 eWAT), where we represent the changes induced by HFD and Intervention on  
489 mitochondrial respiratory states (Mito), gene expression (Genes) and metabolites  
490 (Met). Each bar corresponds to the 100% of respiratory states/genes/metabolites  
491 analysed. Bands of different colors represent fractions of respiratory  
492 states/genes/metabolites showing different patterns of change: white – no changed;  
493 green – changed after HFD-feeding and reverted with intervention; red – changed  
494 after HFD-feeding and not reverted with intervention; grey – changed uniquely with  
495 intervention. B: Bar graph for RNA-seq in liver and eWAT. The black area represents

496 gene transcripts with changed expression after HFD-feeding. C-D: Percentage of  
497 gene transcripts reverted (green) or non-reverted (red) in liver (C) and eWAT (D) after  
498 the combined intervention.

499

500 **Figure 3. Impairment of adipose tissue plasticity.** A: Heatmap representing z-  
501 scores for RNA-seq cluster of transcripts downregulated after HFD-feeding (Ctrl n=8,  
502 HFD n=4, Int n=4). B: Gene ontology biological process (GOBP) enrichment  
503 analysis for the 1369 transcripts downregulated in HFD and Int. C: Electronic  
504 microscopy representative images of mitochondria cristae frequency, category 0, 1,  
505 2 or 3 (see Methods section for category definition). D: Cristae density score  
506 according to categories detailed in C (Ctrl n=3, HFD n=4, Int n=4). E: Normalised  
507 protein expression of OPA1 (Ctrl n=7, HFD n=9, Int n=9). F: Mitochondrial respiratory  
508 states for eWAT homogenate (Ctrl n=13, HFD n=9, Int n=10). Substrates; P:  
509 pyruvate, M: malate, G: glutamate and S: succinate. Pathways; N: NADH electron  
510 transfer-pathway, S: Succinate dehydrogenase-linked pathway and NS: NS-linked  
511 pathways. Respiratory rates; L: Leak-state; P: Oxidative phosphorylation  
512 (OXHPOS)-state; E: Electron transfer (ETS)-state (35). G: Heatmap representing z-  
513 scores for RNA-seq cluster of transcripts upregulated after HFD-feeding (Ctrl n=8,  
514 HFD n=4, Int n=4). H: Gene ontology biological process (GOBP) enrichment  
515 analysis for the 1129 transcripts upregulated in HFD and Int. I: Epididymal WAT  
516 weight for control (Ctrl n=32, HFD n=32, Int n=26). J: Representative images for  
517 hematoxylin and eosin eWAT staining for each experimental group (Ctrl n=3, HFD  
518 n=4, Int n=4). Ctrl: control; HFD: high fat diet-fed; Int: intervention. Data represented

519 as mean  $\pm$  SEM, ANOVA One-way and Post-hoc Tukey, \* $p < 0.05$ , \*\* $p < 0.01$ ,  
520 \*\*\* $p < 0.001$ , and \*\*\*\* $p < 0.0001$ .

521

522 **Figure 4. Mitochondrial deterioration in remodeled white adipose tissue. A:**

523 Scheme with the 4 experimental groups indicating the non-reverted parameters after

524 the first intervention (Int) and the rationale to then include a second intervention (Int2).

525 B: Basal (t=0min) and 15min insulin levels during IGTT (Ctrl n=28, HFD n=30, Int

526 n=14, Int2 n=10). C: Normalised pancreatic islet insulin area by total pancreas area

527 for Ctrl n=6, HFD n=6, Int n=4, Int2 n=4. D: Representative images for hematoxylin

528 and eosin eWAT, Caspase3- and Mac2-positive cells staining in eWAT for each

529 experimental group (Ctrl n=3-4, HFD n=4, Int n=3-4, Int2 n=4-5). E: Representative

530 of IB4-positive stained blood vessels in flat-mounted eWAT depots from each

531 experimental group. F: IB4-positive area quantification (Ctrl n=4, HFD n=3, Int n=4,

532 Int2 n=6). G: Normalized Hif1- $\alpha$  gene expression in eWAT (Ctrl n=8, HFD n=4, Int

533 n=4, Int2 n=4). H: Succinate metabolite levels in eWAT (Ctrl n=15, HFD n=13, Int

534 n=6, Int2 n=6). I: Heatmap representing z-scores for RNA-seq cluster of transcripts

535 upregulated after HFD-feeding and not recovered after Int (Ctrl n=8, HFD n=4, Int

536 n=4, Int2 n=4). J and K: Gene ontology biological processes (J) and cellular

537 components (K) enrichment of the genes clustered in 4I that revert after Int2. L: Z-

538 score for RNA-seq cluster of transcripts downregulated after HFD-feeding and not

539 recovered after Int (Ctrl n=8, HFD n=4, Int n=4, Int2 n=4). M and N: Gene ontology

540 biological processes (M) and cellular components (N) enrichment of the genes

541 clustered in 4L that revert after Int2. O and P: Gene ontology biological processes (O)



542 and cellular components (P) enrichment of the genes clustered in 4L that do not revert  
543 after Int2. Q: Mitochondrial respiratory states for eWAT homogenate (Ctrl n=13, HFD  
544 n=9, Int n=10, Int2 n=13). Substrates; P: pyruvate, M: malate, G: glutamate and S:  
545 succinate. Pathways; N: NADH electron transfer-pathway, S: Succinate  
546 dehydrogenase-linked pathway and NS: NS-linked pathways. Respiratory rates; L:  
547 Leak-state; P: Oxidative phosphorylation (OXHPOS)-state; E: Electron transfer  
548 (ETS)-state. Ctrl: control; HFD: high fat diet-fed; Int: intervention; Int2: second  
549 intervention. Data represented as mean  $\pm$  SEM, ANOVA One-way and Post-hoc  
550 Tukey, \* $p < 0.05$ , \*\* $p < 0.01$ , \*\*\* $p < 0.001$ , and \*\*\*\* $p < 0.0001$ .

551

552 **Figure 5. Metabolic plasticity breakdown in eWAT.** A: Z-score for RNA-seq  
553 clusters of transcripts sequentially downregulated after HFD-feeding or the  
554 interventions, namely clusters A, B and C (Ctrl n=8, HFD n=4, Int n=4, Int2 n=4). B  
555 and C: Radar chart showing the gene ontology biological processes (B) and cellular  
556 components (C) enrichment after HFD-feeding (cluster A) or the interventions  
557 (clusters B and C). Pie proportion indicates gene size for each term or terms-groups  
558 indicated in the outside of the radar chart. Different colors represent different terms  
559 or terms-groups. D and E: Total cardiolipin (CL) abundance (D) and  
560 Monolysocardiolipin (MLCL) relative abundance (E) (Ctrl n=5, HFD n=10, Int2 n=8).  
561 F-I: Normalized gene expression of Pla2g6 (F), Lpgat1 (G), Lclat1 (H) and Hsd17b10  
562 (I) in eWAT (Ctrl n=8, HFD n=4, Int n=4, Int2 n=4). J-M: Mitochondrial DNA (mtDNA)  
563 copy number in subcutaneous white adipose tissue (J), liver (K), skeletal muscle  
564 gastrocnemius (L) and epididymal WAT (M) (Ctrl n=6, HFD n=6, Int n=6, Int2 n=5,

565 Ctrl+IF n=8, HFD+Chow n=4, HFD+IF n=10, \* indicate significant differences with Ctrl  
566 group); *normalized by Ctrl mice* refers to eWAT Ctrl group (M). Ctrl: control; HFD:  
567 high fat diet-fed; Int: intervention; Int2: second intervention; Ctrl+IF: control + dietary  
568 intervention; HFD+Chow: high fat diet-fed + chow Ad libitum; HFD+IF: high fat diet-  
569 fed + dietary intervention. Data represented as mean  $\pm$  SEM, ANOVA One-way and  
570 Post-hoc Tukey, \* $p < 0.05$ , \*\* $p < 0.01$ , \*\*\* $p < 0.001$ , and \*\*\*\* $p < 0.0001$ .

571

## 572 **Materials and Methods**

### 573 **Animals**

574 C57BL/6J0laHSD male mice purchased from Envigo (Indiana, IN, USA) were kept  
575 on a 12 h light/12 h dark cycle. Mice were assigned to two groups fed with different  
576 diets for 16 weeks: control group (*Ctrl*; fed with chow diet Teklad Global 14% Protein  
577 Rodent Maintenance Diet by Envigo; final inclusion criteria: body weight (BW) < 33  
578 g, fasting normoglycemia, fasting normal insulin, glucose tolerance and insulin  
579 sensitivity); and a high-fat diet-fed group (*HFD*; D12451 by Research Diets, New  
580 Brunswick, NJ, USA), final inclusion criteria: BW > 37 g, fasting hyperglycemia,  
581 fasting hyperinsulinemia, glucose intolerance and insulin resistance). After 16 weeks  
582 on HFD, a subgroup of *HFD* mice was assigned to the intervention group (*Int*, fed  
583 with Preliminary Formula Rodent Diet with 45 kcal% Fat and Modification with  
584 Flaxseed and Olive Oil by Research Diets, New Brunswick, NJ, USA); and a further  
585 intervention was performed (*Int2*, fed with the same diet as the *Int* group), see  
586 intervention details below. All animal procedures were approved by the local ethics

587 committee, Comitè Ètic d'Experimentació Animal at Universitat de Barcelona and  
588 the Departament d'Agricultura, Ramaderia, Pesca, Alimentació i Medi Natural at the  
589 Generalitat de Catalunya; complying with current Spanish and European legislation.

590

### 591 **Nutritional and exercise intervention**

592 Nutritional and exercise intervention (*Int* group) was initially for 5 weeks. The daily  
593 energy intake was different during the first week compare to resting weeks, being  
594 mice fed with 80% and then 100% in kcal of the daily energy intake determined for  
595 a *Ctrl* animal, respectively. Intervention diet aimed at maintain energy content from  
596 fat (45%) and included several nutritional modifications: replacement of sucrose by  
597 corn starch and increase in mono- and polyunsaturated FA by changing oil origin  
598 (flaxseed and olive oil were used instead of lard). Intervention diet was combined  
599 with an exercise training program on a treadmill (Exer-6M Open Treadmill for Mice  
600 and Rats with Shocker and Software 2-102 M/m Columbus Instruments; Columbus,  
601 OH, USA). Acclimatisation was performed already during the first week of  
602 intervention for 3 days prior 4 weeks of exercise training (5 days/week, 1 h/day). The  
603 protocol was designed to increase gradually the speed until reaching a final  
604 maximum speed of 20 m/min with a second level inclination (10°). In order to address  
605 new experimental hypothesis, a second phase of intervention was implemented for  
606 5 extra weeks (*Int2* group). *Int2* maintained the diet (100% in kcal content of the daily  
607 energy intake determined for a *Ctrl* animal) and the exercise program was adjusted  
608 to an alternate-day workout, 1 hour/day with a fixed moderate speed (14-16 m/min)  
609 and inclination (5%).

610

## 611 **Body composition**

612 Mice were scanned using Magnetic Resonance Imaging in a 7.0 Tesla BioSpec  
613 70/30 horizontal (Bruker BioSpin, Ettlingen, Germany), equipped with an actively  
614 shielded gradient system (400 mT/m, 12 cm inner diameter). Animals were placed  
615 in a supine position in a Plexiglas holder with a nose cone for administering  
616 anesthetic (1.5% isoflurane in a mixture of 30% O<sub>2</sub> and 70% N<sub>2</sub>O). Mice were  
617 scanned from below the head to the beginning of the tail, in 1.5 mm sections. A 3D  
618 reconstruction merging all the images was performed. Fat volume shown in white  
619 contrast was calculated merging the area values for each image. A Whole-body  
620 Composition Analyser (EchoMRI™, Houston, TX, USA) was used additionally.

621

## 622 **Indirect calorimetry**

623 TSE LabMaster (TSE Systems, Bad Homburg, Germany) was used as described  
624 previously (36, 37). Mice were acclimated for 24 h and then monitored for an  
625 additional 48h. Data was collected every 30 min for O<sub>2</sub> consumption and CO<sub>2</sub>  
626 production to determine energy expenditure with standard analysis software  
627 provided with the calorimeter system. Heat production was calculated by the  
628 abbreviated Weir equation ( $[3.94(\text{VO}_2) + 1.11(\text{VCO}_2)] \cdot 1.44$ ) (38). Food and water  
629 intake, and locomotor activity were determined continuously for 48h. 30 min-RER  
630 values were averages for each animal in the same time point across 24 h. Median  
631 of these average for each animal was considered baseline, and the deviation to it  
632 was calculated, along with the maximal and minimum values.

633

634 **Glucose homeostasis *in vivo* functional assays**

635 Intraperitoneal Glucose Tolerance Test (IGTT) was performed after 16 h fasting (D-  
636 Glucose at 2 g/kg of mouse BW). Blood glucose was measured before and 15, 30,  
637 60 and 120 min after glucose administration. Insulin levels at time 0 and 15 were  
638 measured by ELISA (90080 Crystal Chem Inc., Elk Grove Village, IL, USA)  
639 according to manufacturer's instructions. Insulin Tolerance Test (ITT) was performed  
640 after 4h fasting (insulin Humulin R 100 UI/mL Regular by Eli Lilly and Company  
641 (Indiana, IN, USA), at 0.75 UI/kg of mouse BW). Blood glucose was measured using  
642 a glucometer before and 15, 30, 60 and 120 min after insulin administration.

643

644 ***In vitro* glucose-stimulated insulin secretion (GSIS)**

645 Animals were anaesthetised and 2-3 mL of fresh collagenase XI solution was  
646 injected in the clamped end of the bile duct inserted in the duodenum (Collagenase  
647 from *Clostridium histolyticum*, Type XI, 2-5 FALGPA units/mg solid, >1200 CDU/mg  
648 solid; C7657 Sigma, St. Louis, MI, USA) at 1000 U/mL in Hank's Balanced Salt  
649 Solution (HBSS without MgCl<sub>2</sub> and CaCl<sub>2</sub>; Gibco, Thermo Fisher Scientific,  
650 Waltham, MA, USA). Pancreas tissue was then collected and incubated at 38°C for  
651 14 min before manual agitation, and after two washes with ice-cold HBSS containing  
652 CaCl<sub>2</sub> (HBSS, Sigma, St. Louis, MI, USA), the pellet was resuspended in 7 mL and  
653 filtered (Cell Strainer 70 um Nylon; BD Falcon, Bedford, MA, USA). The islets in the  
654 filter were washed twice with HBSS and plated in a RPMI solution by inverting the

655 filter (RPMI, Gibco, Thermo Fisher Scientific, Waltham, MA, USA, supplemented  
656 with 2 mM L-glutamine, 1000 units/mL of both penicillin and streptomycin, Thermo  
657 Fisher Scientific, Waltham, MA, USA, and 10% FBS, Biosera, Manila, Philippines).  
658 About 70 islets per animal were handpicked for each animal and cultured overnight  
659 in RPMI media, and then splitted in tubes of 15. To measure *insulin secretion*, islets  
660 were pre-incubated in agitation for 30 min in freshly prepared KRBH secretion  
661 solution (NaCl<sub>2</sub> 140 mM, KCl 4.5 mM, MgCl<sub>2</sub>·6H<sub>2</sub>O 1mM, HEPES 20 mM, CaCl<sub>2</sub> 2.5  
662 mM, 0.1%BSA, with 2.8 mM glucose) and then incubated in KRBH solution with 2.8  
663 mM or 16.7 mM glucose for 1h. Supernatants were collected and for *insulin content*,  
664 remaining islets were lysed in glacial acetic (5.75% (v/v) in 0.1%BSA) following an  
665 overnight freezing cycle at -80°C, warm them at 95°C for 10 min, then centrifuging  
666 them at 4°C and collecting the supernatant. Insulin levels were measured in  
667 supernatants from both *insulin secretion* and *insulin content* assays, by ELISA  
668 (Crystal Chem Inc., Elk Grove Village, IL, USA) according to manufacturer's  
669 instructions. Insulin secretion was normalised by insulin content.

670

## 671 **Analytical measurements**

672 For triglyceride measurements, lipids were extracted from tissue homogenates (100  
673 mg of tissue in SDS 0.1%) using chloroform:methanol (2:1) to extract the organic  
674 phase pellet and resuspend it in ethanol. Triglyceride Reagent, Free Glycerol  
675 Reagent and Glycerol Standard Solution (T2449, F6428, G7793 Sigma, St. Louis,  
676 MI, USA) were used according to a modified protocol from the one provided by  
677 manufacturers in liver and skeletal muscle. Briefly, Free Glycerol Reagent was

678 added to samples and standards in a 96-well microplate (NUNC, Denmark)  
679 incubated at 37°C for 5 min. Absorbance at 540 nm was read before and after the  
680 addition of Triglyceride Reagent (Synergy HT Multi-Mode Microplate Reader,  
681 BioTek, Winooski, VT, USA).

682

### 683 **Pancreas morphometry studies**

684 Collected pancreas tissue was fixed overnight in formalin at 4°C, dehydrated and  
685 embedded in paraffin blocks (Embedding Center, Leica, Buffalo Grove, IL, USA), cut  
686 in 4 µm sections separated by 150 µm (Rotary Microtome, Leica, Buffalo Grove, IL,  
687 USA) and placed in Poly-L-Lysine treated microscope slides. Paraffin was removed,  
688 and the tissue was permeabilised in PBS1X+1%Triton, blocked with 3% BSA in  
689 PBS1 and incubated overnight at 4°C with primary polyclonal antibodies for glucagon  
690 and insulin (Dako, Agilent, Santa Clara, CA, USA) (Table S8). Secondary antibodies  
691 were conjugated with Alexa Fluor®488 and Alexa Fluor®555 (Life Technologies,  
692 Carlsbad, CA, USA) (Table S8) and Hoechst was used for nuclei staining. An  
693 inverted-fluorescence microscope with camera (Leica, Buffalo Grove, IL, USA) and  
694 ImageJ were used to obtain and to measure the number and area of positive cells,  
695 respectively. The pancreas section was stained with toloum chloride to measure  
696 the area and normalise the values.

697

698

699

## 700 **Gene expression**

701 50-100 mg of tissue were homogenised in 1 mL TRI Reagent (93289 Sigma, St.  
702 Louis, MI, USA) using magnetic beads (0.5 mm diameter ZrO<sub>2</sub> for BulletBlender,  
703 NextAdvance, Troy, NY, USA) in a BulletBlender following manufacturer instructions  
704 for each tissue. For adipose tissue samples, a centrifugation was performed at this  
705 point to discard the surface layer. Supernatants were collected for RNA extraction  
706 according to manufacturer's instructions. cDNA was obtained using the High  
707 Capacity cDNA Reverse Transcription Kit (4368814 Applied Biosystems, Thermo  
708 Fisher Scientific, Waltham, MA, USA). cDNA dilution for each tissue was optimised.  
709 RT-PCR assays were performed in 384-well plates (Attendbio, Cerdanyola del  
710 Valles, Spain) using the 7900HT RT-PCR system (Thermo Fisher Scientific,  
711 Waltham, MA, USA) and the commercial reagents *Premix Ex Taq*<sup>™</sup> (BN2001  
712 TaKaRa Bio Inc., Kusatsu, Japan) according to recommended conditions. All  
713 Taqman® probes were obtained from Applied Biosystems (Table S8). A standard  
714 curve of pooled samples was used for quantification.

715

## 716 **Protein content**

717 Tissues were homogenised with magnetic beads as described above and lysed  
718 using 300 uL of lysis buffer (Na<sub>2</sub>HPO<sub>4</sub> 10 mM, NaF 10 mM, Tris pH 7.5-8 50 mM,  
719 EDTA 5 mM, NaCl 150 mM and Triton X-100 150 mM) with the addition of a protease  
720 inhibitors cocktail (Roche), and mechanically disrupted through freeze-thaw cycles.  
721 Supernatants were collected for protein quantification and diluted at a given



722 concentration in lysis buffer and Laemmli sample buffer 4X. Criterion XT Bis-Tris Gel  
723 (BioRad, Hercules, CA, USA) were used for electrophoresis. Transfer of the proteins  
724 to the PVDF membranes was performed using the Trans-Blot Turbo™ Transfer  
725 System (BioRad, Hercules, CA, USA). Membrane was blocked for 1h at RT (5% milk  
726 in TBS-T) and incubated overnight at 4°C with primary antibodies (Table S8).  
727 Secondary antibodies were incubated for 1h at RT. Pierce™ ECL Western Blotting  
728 Substrate (Thermo Fisher Scientific, Waltham, MA, USA) was used in an  
729 ImageQuant LAS 4000 (GE Healthcare, Chicago, IL, USA) for imaging of blots by  
730 chemiluminescence. ImageQuant TL Software (GE Healthcare, IL, USA) was used  
731 for the blot quantification.

732

### 733 **High-resolution respirometry**

734 Mitochondrial respiration was assessed by high-resolution respirometry (HRR) in  
735 glycolytic and oxidative skeletal muscles, hypothalamus, liver and white adipose  
736 tissue. For sample preparation, each tissue was homogenised and permeabilised in  
737 fresh conditions as described in (39). Experiments were performed in Oxygraph-2k  
738 system (Oroboros Instruments, Innsbruck, Austria) according to an established  
739 substrate-uncoupler-inhibitor titration (SUIT) HRR protocol  
740 (<https://www.mitofit.org/index.php/SUIT-008>), where the nomenclature used is  
741 defined (see further details in (35)). Briefly, LEAK respiration was measured in the  
742 presence of the NADH (N)-linked substrates Pyruvate (5mM) and Malate (2mM).  
743 Oxidative phosphorylation capacity was then determined by the addition of ADP

744 (5mM) at saturated concentrations, and cytochrome C (10 $\mu$ M) was added to assess  
745 the integrity of the mitochondrial outer membrane before the addition of Glutamate  
746 (10mM). Then, Succinate (10mM) was added to stimulate the succinate (S)-linked  
747 pathway, allowing the convergent electron flow through both pathways  
748 simultaneously. Subsequent titration of the uncoupler carbonyl cyanide p-trifluoro-  
749 methoxyphenyl hydrazine (FCCP, 0.5 $\mu$ M) was then performed to assess maximal  
750 non-coupled Electron Transfer (ET)-respiratory capacity mediated by NS-linked  
751 pathways. ET-respiratory capacity mediated uniquely by S-pathway was also  
752 evaluated inhibiting complex I by the addition of Rotenone (0.5 $\mu$ M). Finally, residual  
753 oxygen consumption (ROX) was determined by the inhibition of complex III adding  
754 Antimycin A (2,5 $\mu$ M) and this value was subtracted from O<sub>2</sub> flux as a baseline for all  
755 respiratory states. The O<sub>2</sub>k-Software DatLab 7.4 was used for real-time data  
756 acquisition and analysis. Oxygen flux values were expressed relative to tissue wet  
757 weight per second (JO<sub>2</sub>, pmol mg<sup>-1</sup> s<sup>-1</sup>).

758

### 759 **Adipose tissue histology**

760 Histological examination was done using 4  $\mu$ m thick sections from formalin-fixed  
761 paraffin-embedded tissue samples, which were stained with hematoxylin and eosin  
762 (H&E) at the Pathology Department of the Hospital Clinic of Barcelona. Two-four  $\mu$ m  
763 thickness sections from paraffin embedded samples were used for  
764 immunohistochemistry at the Tumour Bank of the HCB-IDIBAPS Biobank (IDIBAPS,  
765 Barcelona) using the Leica Microsystems' Bond-max™ automated immunostainer

766 together with the Bond Polymer Refine Detection System (Leica Microsystems,  
767 Spain). Briefly, tissue sections were deparaffinised, and pretreated for antigen  
768 retrieval with citrate buffer, pH 6.0 20 minutes for Caspase 3 and Mac2. For  
769 macrophage immunostaining: primary monoclonal rat anti-murine antibody to Mac2  
770 (Cedarlane Labs, Burlington, Ontario, Canada) (Table S8) was used at 1:40,000 for  
771 one hour, combined with a secondary rabbit anti-rat Ig at 1:3,000. For apoptosis:  
772 monoclonal rabbit anti-murine Caspase3 antibody (Cell Signaling Technology,  
773 Danvers, MA, USA) (Table S8) was used at 1:500 for one hour. Finally, samples  
774 were developed with diaminobenzidine and counterstained with hematoxylin.

775

#### 776 **Mitochondria electron microscopy**

777 Anesthetized animals were perfused transaortically with 50 mL heparinized saline  
778 (10mg/L heparin in saline (0.9% NaCl)) followed by 100 mL of fixative solution  
779 (glutaraldehyde 2.5% + paraformaldehyde 2% in phosphate buffer 0.1 M pH=7.4).  
780 Once perfused, a small piece of adipose tissue was collected and placed on vials  
781 with fixative solution for 24 h. Samples were rinsed four times with phosphate buffer,  
782 postfixated with 1% osmium tetroxide (EMS, Hatfield, PA, USA) for 2 h and rinsed with  
783 milliQ water. Samples were then dehydrated in an acetone series (50%, 70%, 90%,  
784 96% and 100%, for 10 min each), and infiltrated and embedded in Epon resin (EMS,  
785 Hatfield, PA, USA). Ultrathin sections of 60nm in thickness were obtained using a  
786 UC6 ultramicrotome (Leica, Buffalo Grove, IL, USA) and were stained with 2% uranyl  
787 acetate and lead citrate. Sections were observed in a Jeol 1010 (Gatan, Abitatsu  
788 Yaesu, Japan) equipped with a tungsten cathode and Images were acquired at 80  
789 kv with a CCD Megaview 1kx1k. Mitochondrial cristae density was evaluated

790 distributing mitochondria in 4 categories: 0-not visible cristae; 1-very few cristae; 2-  
791 half of the mitochondria shows cristae, 3-equally distributed cristae.

792

### 793 **Whole mount adipose tissue immunostaining and vessel area quantification**

794 Approximately 3 mm<sup>3</sup> cubes of adipose tissue were cut from each sample and  
795 permeabilised for 1h with phosphate buffer saline (PBS) and 1% Triton-x 100.  
796 Afterwards, tissues were blocked with blocking buffer (PBS + 0,3% Triton-x 100 +  
797 5% goat serum) for 2 h at room temperature. Primary antibody (Isolectin GS-B4 568,  
798 Invitrogen, Thermo Fisher Scientific, Waltham, MA, USA) (Table S8) diluted (1:2000)  
799 in blocking buffer was incubated overnight at room temperature, with over day  
800 washings with PBS + 0,3% Triton-x 100. Afterwards, samples were clarified using  
801 90% glycerol at 4°C overnight. Samples were stored in ProLong™ Gold Antifade  
802 Reagent (P36930 Invitrogen, Thermo Fisher Scientific, Waltham, MA, USA) with  
803 DAPI. Images were taken with a Leica SP5 confocal microscope using 20X and 40X  
804 objectives (Leica, Buffalo Grove, IL, USA). All images are maximal z-stack  
805 projections. Images were processed using Volocity, Fiji and Adobe Photoshop CS5.  
806 Vessel density was quantified by measuring isolectin-B4 positive area, within a fixed  
807 square template, using the ImageJ software.

808

### 809 **Phospholipid extraction**

810 White adipose tissue (WAT) was homogenised in PBS of which 5% was removed to  
811 determine protein content via Bradford assay. Next, lipids were extracted twice from

812 homogenate with 2:1 chloroform:methanol (Folch method) containing 0.5  $\mu\text{M}$   
813 CL(14:0)<sub>4</sub> as internal standard and dried under N<sub>2</sub> flow. Due to the high content of  
814 neutral lipids in WAT, phospholipids were separated by solid-phase extraction using  
815 Sep-Pak C18-columns (Waters Associates, Milford, MA, USA). Briefly, the lipid  
816 extract was re-suspended in 1 mL chloroform, applied on the column and washed  
817 thrice with 1 mL chloroform to elute neutral lipids. Phospholipids were eluted by  
818 quadruple addition of 2:1 chloroform:methanol and quadruple addition of methanol,  
819 collected and dried under N<sub>2</sub> flow.

820

#### 821 **LC-MS/MS analysis of CL MLCL**

822 CL analysis was performed as described in (40). Phospholipid extracts were  
823 dissolved in HPLC starting condition and subjected to HPLC-MS/MS analysis.  
824 Separation was achieved by reversed-phase HPLC with an Agilent Poroshell 120  
825 EC-C8 2.7  $\mu\text{m}$  2.1x100mm column (Agilent Technologies, Santa Clara, CA, USA)  
826 on a Dionex Ultimate 3000 HPLC (Thermo Fisher Scientific, Waltham, MA, USA,  
827 50°C column oven, 0.4 mL/min flow) with running solvent A (60/40 Acetonitrile/H<sub>2</sub>O,  
828 10 mM ammonium formate, 0.2% formic acid) and running solvent B (90/10  
829 Isopropanol/Acetonitrile, 10 mM ammonium formate, 0.2% formic acid). Analytes  
830 were measured using a LTQ Velos MS (Thermo Fisher Scientific, Waltham, MA,  
831 USA) operated in negative ESI mode (3.8kV, 275°C capillary temperature, 460-1650  
832 m/z) and data-dependent MS<sub>2</sub> acquisition. Thermo raw data was converted to open-  
833 source MZML format and Peaks were integrated in MZmine2 (41). Identification was  
834 based on a combination of accurate mass, (relative) retention times, and

835 fragmentation spectra, compared to a library of standards. Data was corrected for  
836 internal standard, normalised on protein content, quantified using an external dilution  
837 series (CL(14:0)<sub>4</sub>, CL(18:1)<sub>4</sub>) and further analysed by an in-house pipeline in R.  
838 Significance was calculated using a one-way ANOVA with post hoc Tukey  
839 correction.

840

#### 841 **Quantification of mtDNA copy number**

842 Mitochondrial DNA (mtDNA) content was determined by qPCR of total DNA  
843 extracted. NucleoSpin Tissue DNA purification kit (Macherey-Nagel, Dueren,  
844 Germany) was used to extract total DNA from adipose tissue according to  
845 manufacturer's protocol, and NanoDrop 1000 Spectrophotometer (Thermo Fisher  
846 Scientific, Waltham, MA, USA) to quantify DNA concentration. GoTaq® qPCR  
847 MasterMix (Promega, Madison, WI, USA) and 3ng of DNA sample were combined  
848 to amplify both mtDNA and nuclear DNA by 7900HT RT-PCR system (Thermo  
849 Fisher Scientific, Waltham, MA, USA) using the following primers; cytochrome C  
850 subunit 2 (*mt-Co2* Fw: CTACAAGACGCCACAT – *mt-Co2* Rv:  
851 GAGAGGGGAGAGCAAT), 12S rRNA (*Mt-Rnr1*Fw:  
852 CTTCAGCAAACCCTAAAAAGG – *Mt-Rnr1*Rv: GCGTACTTCATTGCTCAATTC)  
853 and succinate dehydrogenase subunit A (*Sdha* Fw: TACTACAGCCCCAAGTCT -  
854 *Sdha* Rv: TGGACCCATCTTCTATGC). mtDNA content is referred to nuclear DNA  
855 (nDNA) as the copy number ratio of mtDNA to nDNA.

856

857

## 858 **Metabolomics sample preparation**

859 Pulverised liver tissue (50-100 mg) was mixed with ice-cold acetonitrile:water (1:1)  
860 and ultrasonicated, and the combined supernatant aqueous phases of 3 repetitions  
861 were frozen and lyophilised. The resultant pellet was dried and extracted with  
862 chloroform:methanol (2:1) by ultrasonication. The supernatant organic phase was  
863 collected and dried under N<sub>2</sub> stream. Pulverised white adipose (30-70 mg),  
864 gastrocnemius (20-40 mg) and hypothalamus (10-25 mg) tissue was mixed with  
865 methanol and ultrasonicated before chloroform was added in two steps to final 1:1.  
866 Water was added 1:2:2 (water:methanol:chloroform) and the aqueous upper phase  
867 containing water and methanol and the organic lower phase were collected  
868 separately. An aqueous extract was dissolved in D<sub>2</sub>O (containing 0.67 mM  
869 trisilylpropionic, TSP) and the organic extract was reconstituted in CDCl<sub>3</sub>/CD<sub>3</sub>OD  
870 (2:1) solution (containing 1.18 mM tetramethylsilane, TMS). The supernatant of both  
871 phases was transferred into 5mm NMR tubes.

872

## 873 **Nuclear Magnetic Resonance (NMR) metabolomics analysis**

874 <sup>1</sup>H-NMR spectra were recorded at 310K on a Bruker Avance III 600 spectrometer  
875 (Bruker, Billerica, USA) operating at a proton frequency of 600.20MHz using a 5mm  
876 CPTCI triple resonance (<sup>1</sup>H, <sup>13</sup>C, <sup>31</sup>P). One-dimensional <sup>1</sup>H pulse experiments of  
877 aqueous samples were performed. In order to suppress the residual water peak the  
878 experiments were recorded using the *NOESY-presat* sequence, with the mixing time  
879 set at 100ms. A 75Hz-power irradiation was applied during recycling delay and

880 mixing time to presaturate the solvent. A total of 256 transients were collected into  
881 64 k data points for each  $^1\text{H}$  spectrum, being the spectral width set as 12 kHz (20  
882 ppm). The exponential line broadening applied before Fourier transformation was of  
883 0.3Hz. In order to remove the residual water moisture of deuterated methanol, lipidic  
884 samples were measured using a simple presaturation sequence. Thus, a 50Hz-  
885 power irradiation was used during recycling delay and mixing time to presaturate the  
886 solvent. Again, 256 transients were collected into 64 k data points for each  $^1\text{H}$   
887 spectrum, being the spectral width set as 12kHz (20 ppm). The exponential line  
888 broadening applied before Fourier transformation was also here of 0.3Hz. Of note,  
889 the frequency domain spectra were manually phased and baseline-corrected using  
890 TopSpin software (version 2.1, Bruker, Billerica, USA).

891

## 892 **NMR data analysis**

893 All the acquired  $^1\text{H}$  NMR spectra were phased, baseline-corrected, and referenced  
894 to the chemical shift of TSP or TMS signal at 0 ppm. For metabolic identification,  
895 references of pure compounds from the metabolic profiling AMIX spectra database  
896 (Bruker, Billerica, USA), human metabolome database (HMDB), and Chenomx  
897 databases were used (Chenomx Inc. Edmonton, Canada) . After baseline correction,  
898 specific  $^1\text{H}$  NMR regions identified in the spectra were integrated for each extraction  
899 method entering the study using the AMIX 3.8 software package. Then, each  
900 integration region was normalised using the tissue weight used from each sample.



901 Data (pre-) processing, data analysis, and statistical calculations were performed in  
902 RStudio (R version 3.0.2).

903

#### 904 **RNA-Seq data processing and differential expression analysis**

905 RNA samples from 20 WAT samples (Ctrl n=8, HFD n=4, Int n=4 and Int2 n=4) as  
906 well as 12 liver tissue samples (Ctrl n=4, HFD n=4 and Int n=4) were sequenced by  
907 standard Illumina protocol to create raw sequence files (.fastq files), which  
908 underwent quality control analysis using FastQC  
909 (<http://www.bioinformatics.babraham.ac.uk/projects/fastqc/>). We aligned the quality  
910 checked reads to the Mouse Genome, version July 2007 (NCBI37/mm9) using  
911 TopHat version 2.1.1 allowing for unique alignments to the genome and up to two  
912 mismatches. The resulting alignments were summarised by Ensembl gene  
913 identifiers to evaluate number of uniquely aligned reads per transcript and per  
914 sample (raw read counts).

915 RNA-seq data were analysed using the limma package version 1.8.2 available  
916 through the Bioconductor open source. The raw read counts were used as input to  
917 form a DGEList object combining the counts and associated annotation. Scale  
918 normalisation was applied and the calculation of normalised signal was performed  
919 by voom function of the limma package (42) available through the Bioconductor open  
920 source software. This differential expression analysis was performed pair-wise  
921 between different experimental conditions, but per each tissue type separately  
922 (FDR<0.05). First, we identified genes either up- or downregulated in HFD conditions

923 as compared to controls. Then, we explored the expression modulation of these two  
924 sets of genes after first intervention (Int). We could determine three distinct patterns:  
925 1) genes fully recovered (with differential expression between HFD and Int but no  
926 significant difference in expression between controls and Int); 2) genes partially  
927 recovered (not reaching the same expression level as in control conditions but  
928 showing the recovering tendency between HFD and Int); 3) genes not recovered  
929 (that continue to be differentially expressed between Int and controls, with no  
930 significant difference in expression between HFD and Int). In the case of WAT, for  
931 the third, not recovered category, we performed similar expression patterns analysis  
932 using the data of second intervention (Int2), defining the genes that recovered or not  
933 after this additional experimental step.

934

### 935 **Gene Ontology analysis**

936 For different gene sets, GO enrichments were performed using the GOstats R  
937 package (43), separately for biological processes and cell compartments related GO  
938 terms. Significant GO terms ( $p < 0.0001$ ) were further summarised together by  
939 ReVigo software (44) in order to represent them as semantic-similarity scatter plot  
940 of the most significant GO terms, with a modification of the script to represent the  
941 GO enrichment values as dot size. To represent the cascade of GO terms affected  
942 in different steps of the experiment (HFD, Int and Int2, Figure5), we combined a  
943 biological and semantic approach, merging those GO terms that contained the same  
944 genes and that were related to the same biological process or cell compartment. In  
945 this analysis, general, ancestor GO terms (the highest level in GO terms tree;

946 typically containing over 500 genes) as well as very specific GO terms (typically  
947 containing less than 5 genes) were excluded, in order to obtain a clearer view of the  
948 GO terms dynamics throughout three different experimental conditions.

949

## 950 **Database and pattern data analysis**

951 Gene expression (transcriptomics), metabolites content (metabolomics) and  
952 mitochondrial respiration states (high-resolution respirometry) patterns were  
953 analysed and are presented in Figure 2. A Content Management System (CMS)  
954 dynamic database with a front-end user interface or a content management  
955 application (CMA) ([idibaps.seeslab.net](http://idibaps.seeslab.net)) was created along with a Content Delivery  
956 Application (CDA) that compiles all the information and updates the website. An  
957 entry for each mouse was generated including both *phenotypical information* (e.g.,  
958 animal identification, group (Ctrl, HFD or Int), body weight, glucose levels (IGTT,  
959 ITT), etc) and *specific-tissue data* (e.g., mitochondrial respiratory values, gene  
960 expression data, protein content data, targeted metabolomics data, etc). Python  
961 scripts allowed correlation and comparison analysis of all the attributes entered in  
962 the database, which were structured in a pandas. DataFrame  
963 (<http://pandas.pydata.org/>) generated from the database. NumPy and SciPy were  
964 used for working with multi-dimensional arrays and matrices as well as for calculating  
965 high-level mathematical functions. Matplotlib was used for graphical representations  
966 (i.e., stacked bar plot). Pattern data analysis: to visually show the proportion of  
967 parameters that were reversed after the intervention we defined a 3-point vector for  
968 each parameter (e.g., gene expression, metabolite, mitochondrial respiration state)

969 in which the 3 points correlated to the mean of this given parameter for 1) Ctrl group  
970 2) HFD-fed group and 3) Int group (i.e.,  $parameter=[Ctrl\ mean, HFD\ mean, Int$   
971  $mean]$ ). Mann-Whitney comparisons were used to compare the groups. Once the  
972 significant differences were calculated, different patterns were defined: green for a  
973 reversion pattern after the intervention; red for no reversion in the intervention group,  
974 so the mean value in the HFD group, which is significantly different from the Ctrl  
975 group, is not different in comparison to the Int group; and grey for a difference in the  
976 Int group in comparison to the other two groups, between the ones there is no  
977 difference. Once these patterns were defined for gene expression, metabolites and  
978 mitochondrial respiration states in skeletal muscle (gastrocnemius, soleus and  
979 tibialis anterior), hypothalamus, liver and epididymal adipose tissue, stacked bar  
980 plots were used to visualise the relative percentage of all the  
981 genes/metabolites/respiratory states falling in the different patterns.

982

### 983 **Statistical analysis**

984 Results are expressed as Mean $\pm$ SEM. The statistical significance among the three  
985 experimental groups was assessed using one-way ANOVA, and differences  
986 between means were subsequently tested by Tukey post-hoc test. Data curation  
987 involved the removal of values that were  $\pm 2$  standard deviation (SD) in punctual  
988 situations. A p-value  $< 0.05$  was considered significant in all cases, meaning a  
989 confidence interval of 95% and setting significance level at  $\alpha = 0.05$ . Tendencies with  
990 p-value between 0.05 and 0.07 are also indicated. All statistical analyses were  
991 performed using GraphPad 6 (GraphPad Software, Inc. La Jolla, CA, USA).

992 **Lead Contact**

993 Further information and requests for resources should be directed to and will be

994 fulfilled by the Lead Contact, Pablo M. Garcia-Roves ([pgarciaroves@ub.edu](mailto:pgarciaroves@ub.edu)).

## References

1. WHO, <https://www.who.int/en/news-room/fact-sheets/detail/obesity-and-overweight>.
2. M. Bluher, Obesity: global epidemiology and pathogenesis. *Nat Rev Endocrinol* **15**, 288-298 (2019).
3. M. A. van Baak, E. C. M. Mariman, Mechanisms of weight regain after weight loss - the role of adipose tissue. *Nat Rev Endocrinol* **15**, 274-287 (2019).
4. S. B. Heymsfield, T. A. Wadden, Mechanisms, Pathophysiology, and Management of Obesity. *N Engl J Med* **376**, 1492 (2017).
5. F. Bäckhed *et al.*, The next decade of metabolism. *Nature Metabolism* **1**, 2-4 (2019).
6. DIAMAP, <https://www.diamap.eu/roadmap/domain/detail/3>.
7. V. A. Fonseca, Defining and characterizing the progression of type 2 diabetes. *Diabetes Care* **32 Suppl 2**, S151-156 (2009).
8. J. E. Galgani, C. Moro, E. Ravussin, Metabolic flexibility and insulin resistance. *Am J Physiol Endocrinol Metab* **295**, E1009-1017 (2008).
9. L. Wilson-Fritch *et al.*, Mitochondrial remodeling in adipose tissue associated with obesity and treatment with rosiglitazone. *J Clin Invest* **114**, 1281-1289 (2004).
10. J. X. Rong *et al.*, Adipose mitochondrial biogenesis is suppressed in db/db and high-fat diet-fed mice and improved by rosiglitazone. *Diabetes* **56**, 1751-1760 (2007).
11. A. De Pauw, S. Tejerina, M. Raes, J. Keijer, T. Arnould, Mitochondrial (dys)function in adipocyte (de)differentiation and systemic metabolic alterations. *Am J Pathol* **175**, 927-939 (2009).
12. S. Boudina, T. E. Graham, Mitochondrial function/dysfunction in white adipose tissue. *Exp Physiol* **99**, 1168-1178 (2014).
13. J. H. Lee *et al.*, The Role of Adipose Tissue Mitochondria: Regulation of Mitochondrial Function for the Treatment of Metabolic Diseases. *Int J Mol Sci* **20**, (2019).
14. S. Carobbio, V. Pellegrinelli, A. Vidal-Puig, Adipose Tissue Function and Expandability as Determinants of Lipotoxicity and the Metabolic Syndrome. *Adv Exp Med Biol* **960**, 161-196 (2017).
15. K. Sun *et al.*, Dichotomous effects of VEGF-A on adipose tissue dysfunction. *Proc Natl Acad Sci U S A* **109**, 5874-5879 (2012).
16. I. Wernstedt Asterholm *et al.*, Adipocyte inflammation is essential for healthy adipose tissue expansion and remodeling. *Cell Metab* **20**, 103-118 (2014).
17. C. Crewe, Y. A. An, P. E. Scherer, The ominous triad of adipose tissue dysfunction: inflammation, fibrosis, and impaired angiogenesis. *J Clin Invest* **127**, 74-82 (2017).
18. F. P. Hoevenaars *et al.*, Adipose tissue metabolism and inflammation are differently affected by weight loss in obese mice due to either a high-fat diet restriction or change to a low-fat diet. *Genes Nutr* **9**, 391 (2014).
19. D. Y. Jung *et al.*, Short-term weight loss attenuates local tissue inflammation and improves insulin sensitivity without affecting adipose inflammation in obese mice. *Am J Physiol Endocrinol Metab* **304**, E964-976 (2013).
20. A. Kosteli *et al.*, Weight loss and lipolysis promote a dynamic immune response in murine adipose tissue. *J Clin Invest* **120**, 3466-3479 (2010).
21. B. Liu *et al.*, Intermittent Fasting Improves Glucose Tolerance and Promotes Adipose Tissue Remodeling in Male Mice Fed a High-Fat Diet. *Endocrinology* **160**, 169-180 (2019).
22. J. Schmitz *et al.*, Obesogenic memory can confer long-term increases in adipose tissue but not liver inflammation and insulin resistance after weight loss. *Mol Metab* **5**, 328-339 (2016).

23. B. F. Zamarron *et al.*, Macrophage Proliferation Sustains Adipose Tissue Inflammation in Formerly Obese Mice. *Diabetes* **66**, 392-406 (2017).
24. S. Michel *et al.*, Crosstalk between mitochondrial (dys)function and mitochondrial abundance. *J Cell Physiol* **227**, 2297-2310 (2012).
25. F. Boos, J. Labbadia, J. M. Herrmann, How the Mitoprotein-Induced Stress Response Safeguards the Cytosol: A Unified View. *Trends Cell Biol* **30**, 241-254 (2020).
26. Y. A. An *et al.*, Dysregulation of Amyloid Precursor Protein Impairs Adipose Tissue Mitochondrial Function and Promotes Obesity. *Nat Metab* **1**, 1243-1257 (2019).
27. A. J. Chicco, G. C. Sparagna, Role of cardiolipin alterations in mitochondrial dysfunction and disease. *Am J Physiol Cell Physiol* **292**, C33-44 (2007).
28. G. Oemer *et al.*, Phospholipid Acyl Chain Diversity Controls the Tissue-Specific Assembly of Mitochondrial Cardiolipins. *Cell Rep* **30**, 4281-4291 e4284 (2020).
29. J. Li *et al.*, Cardiolipin remodeling by ALCAT1 links oxidative stress and mitochondrial dysfunction to obesity. *Cell Metab* **12**, 154-165 (2010).
30. X. Liu *et al.*, Ablation of ALCAT1 mitigates hypertrophic cardiomyopathy through effects on oxidative stress and mitophagy. *Mol Cell Biol* **32**, 4493-4504 (2012).
31. C. Song *et al.*, Cardiolipin remodeling by ALCAT1 links mitochondrial dysfunction to Parkinson's diseases. *Aging Cell* **18**, e12941 (2019).
32. O. Hahn *et al.*, A nutritional memory effect counteracts benefits of dietary restriction in old mice. *Nat Metab* **1**, 1059-1073 (2019).
33. S. Gumeni, I. P. Trougakos, Cross Talk of Proteostasis and Mitostasis in Cellular Homeodynamics, Ageing, and Disease. *Oxid Med Cell Longev* **2016**, 4587691 (2016).
34. C. Lopez-Otin, M. A. Blasco, L. Partridge, M. Serrano, G. Kroemer, The hallmarks of aging. *Cell* **153**, 1194-1217 (2013).
35. E. Gnaiger, Mitochondrial respiratory states and rates. *MitoFit Preprint Arch* **10.26124/mitofit:190001.v6**, (2019).
36. P. T. Pfluger *et al.*, Simultaneous deletion of ghrelin and its receptor increases motor activity and energy expenditure. *Am J Physiol Gastrointest Liver Physiol* **294**, G610-618 (2008).
37. P. T. Pfluger, D. Herranz, S. Velasco-Miguel, M. Serrano, M. H. Tschop, Sirt1 protects against high-fat diet-induced metabolic damage. *Proc Natl Acad Sci U S A* **105**, 9793-9798 (2008).
38. J. B. Weir, New methods for calculating metabolic rate with special reference to protein metabolism. *J Physiol* **109**, 1-9 (1949).
39. C. Canto, P. M. Garcia-Roves, High-Resolution Respirometry for Mitochondrial Characterization of Ex Vivo Mouse Tissues. *Curr Protoc Mouse Biol* **5**, 135-153 (2015).
40. G. Oemer *et al.*, Molecular structural diversity of mitochondrial cardiolipins. *Proc Natl Acad Sci U S A* **115**, 4158-4163 (2018).
41. T. Pluskal, S. Castillo, A. Villar-Briones, M. Oresic, MZmine 2: modular framework for processing, visualizing, and analyzing mass spectrometry-based molecular profile data. *BMC Bioinformatics* **11**, 395 (2010).
42. C. W. Law, Y. Chen, W. Shi, G. K. Smyth, voom: Precision weights unlock linear model analysis tools for RNA-seq read counts. *Genome Biol* **15**, R29 (2014).
43. S. Falcon, R. Gentleman, Using GOstats to test gene lists for GO term association. *Bioinformatics* **23**, 257-258 (2007).
44. F. Supek, M. Bosnjak, N. Skunca, T. Smuc, REVIGO summarizes and visualizes long lists of gene ontology terms. *PLoS One* **6**, e21800 (2011).

Figure 1.

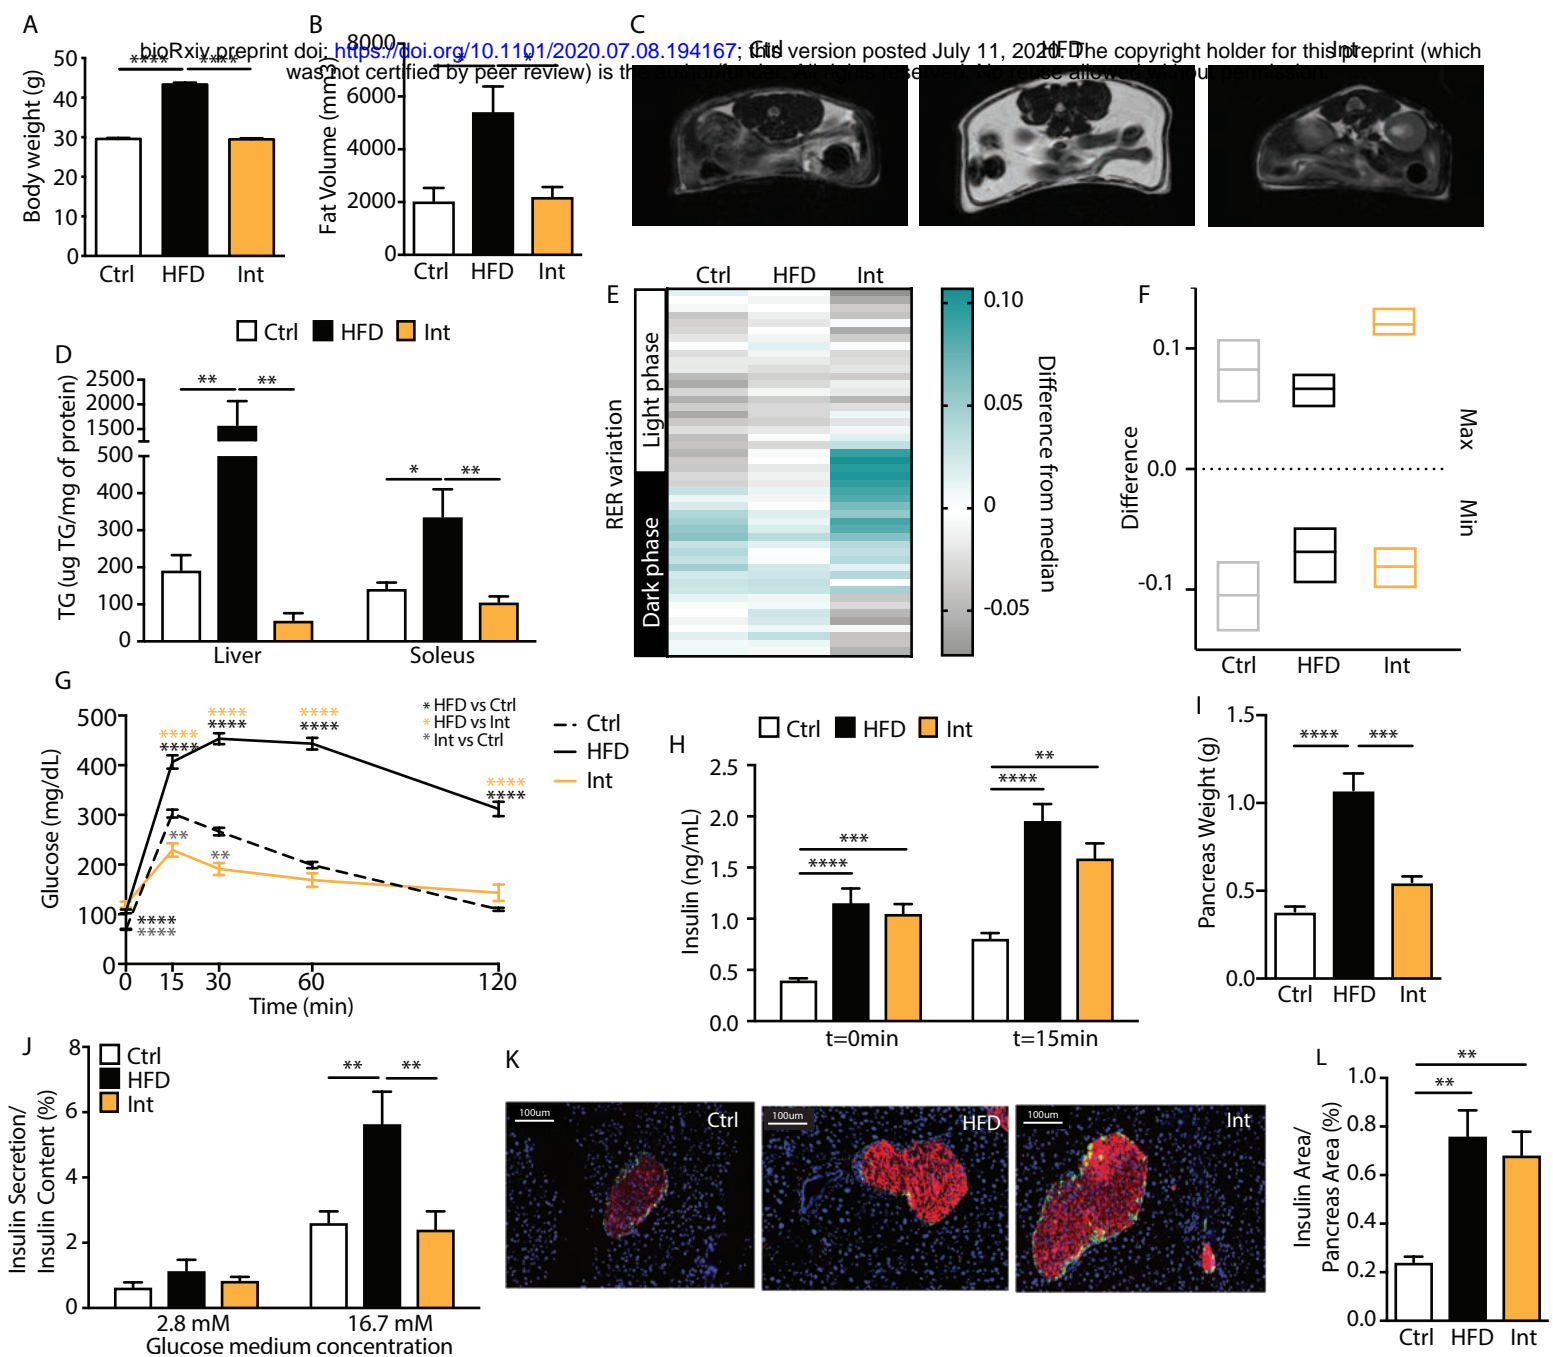



Figure 2.

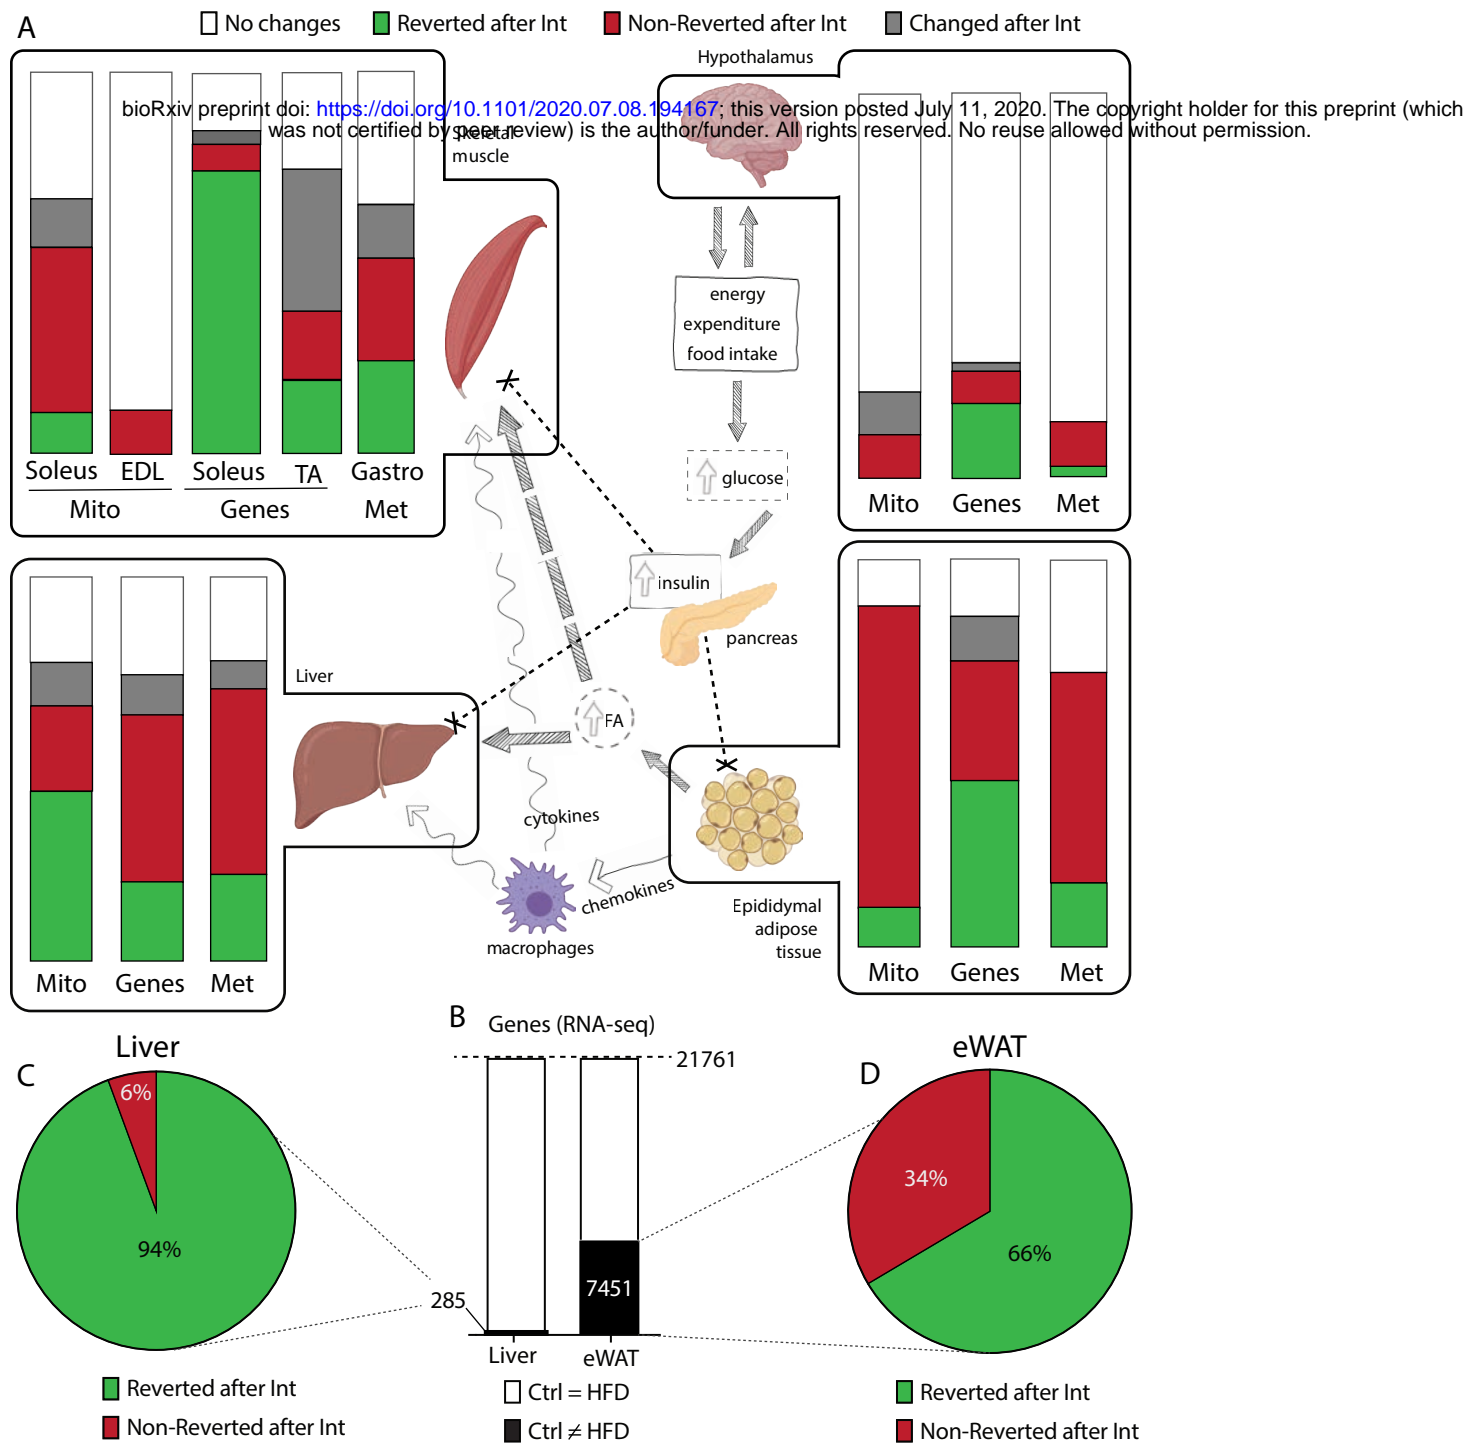

Figure 3.

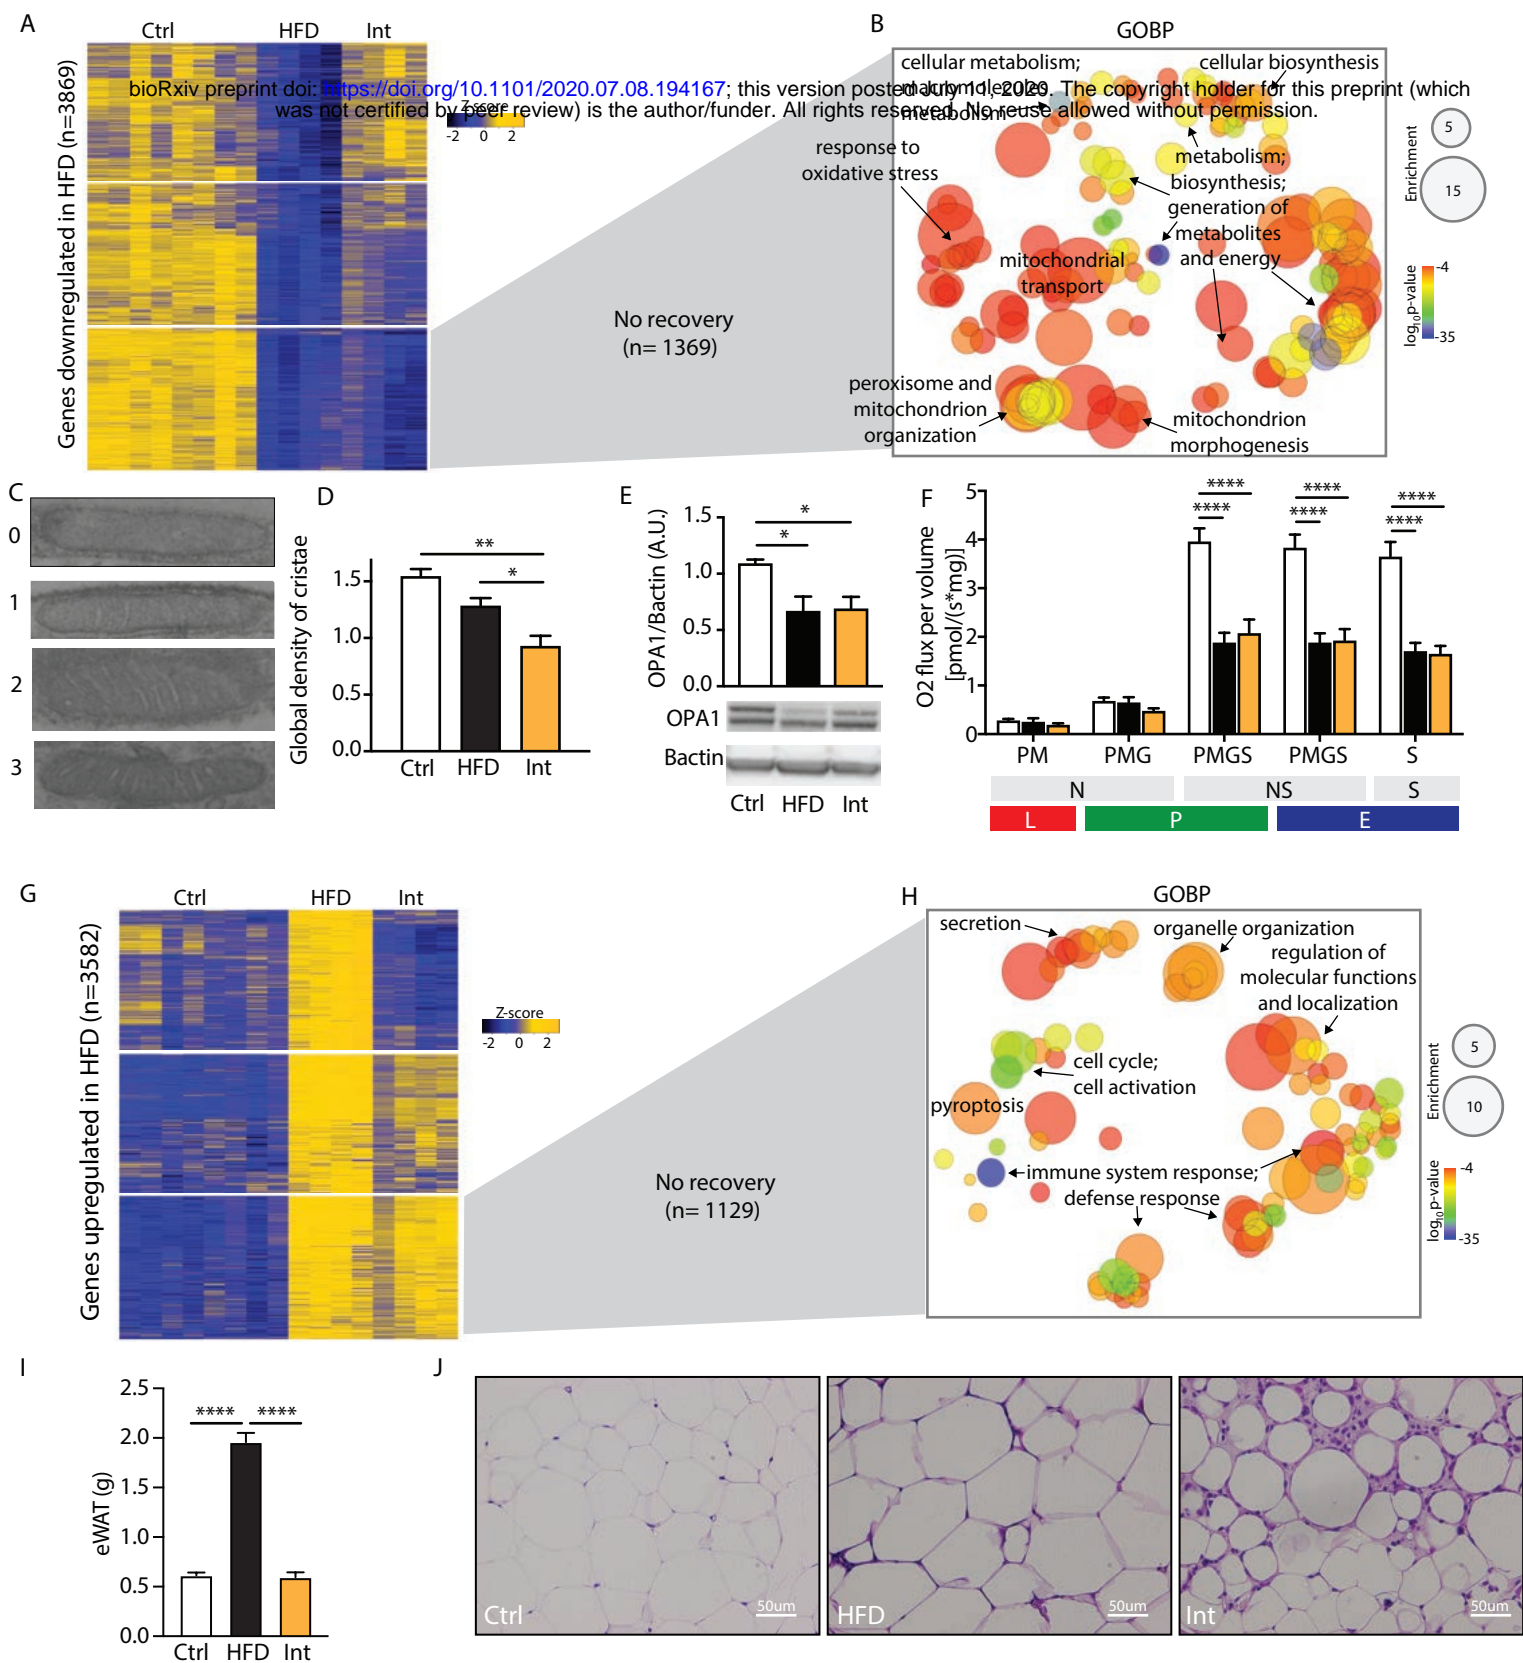

Figure 4.

A

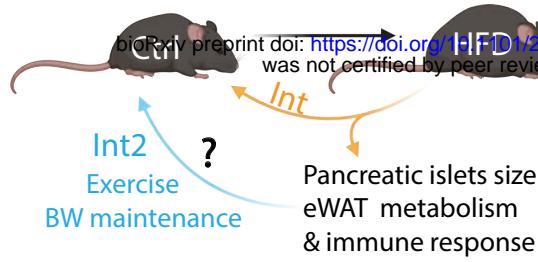

B

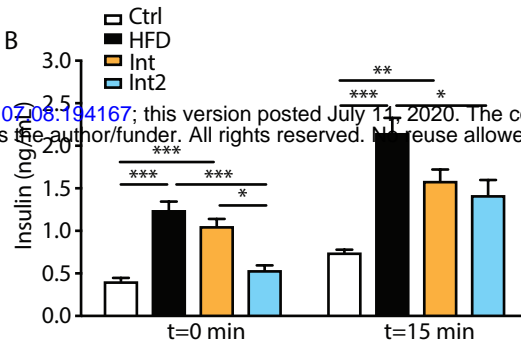

C

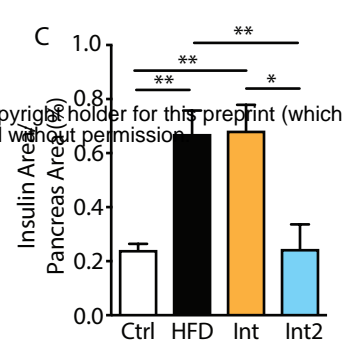

E

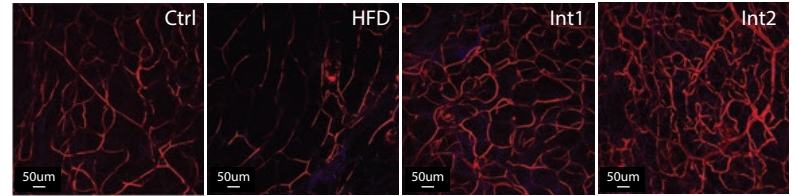

D

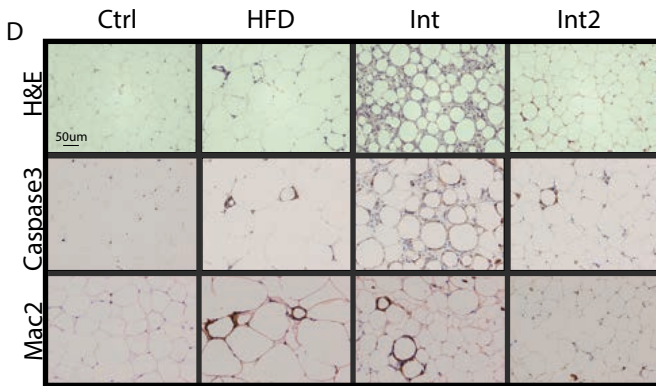

F

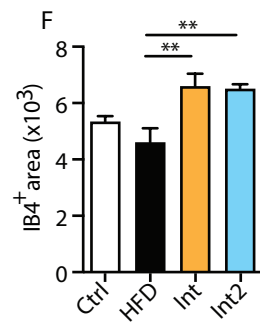

G

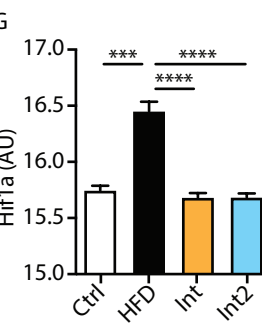

H

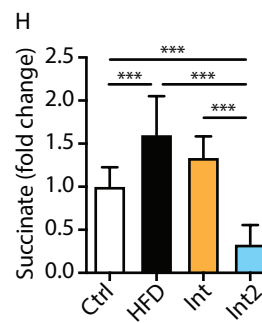

I

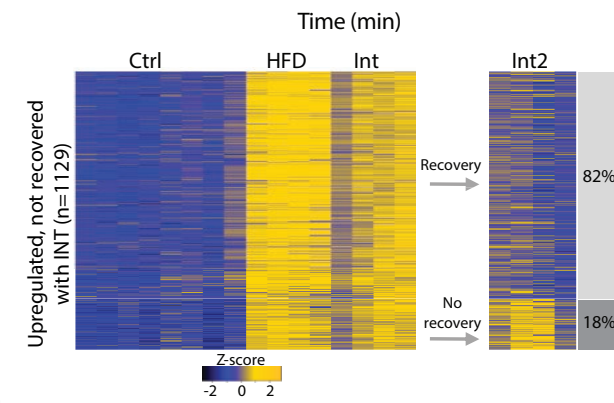

J

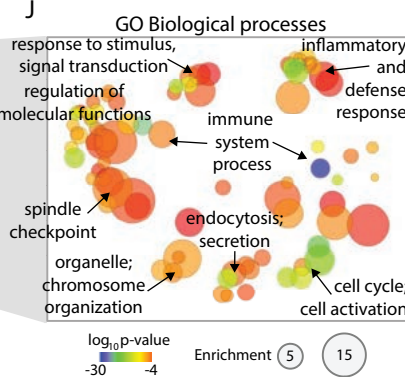

K

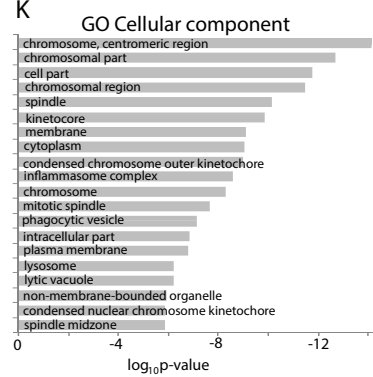

L

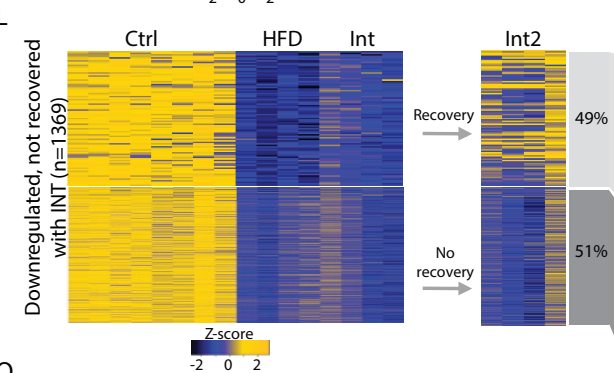

M

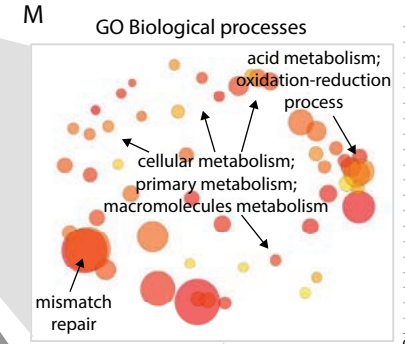

N

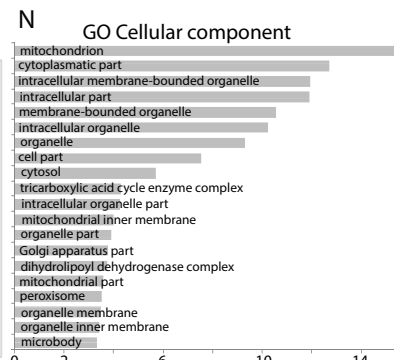

Q

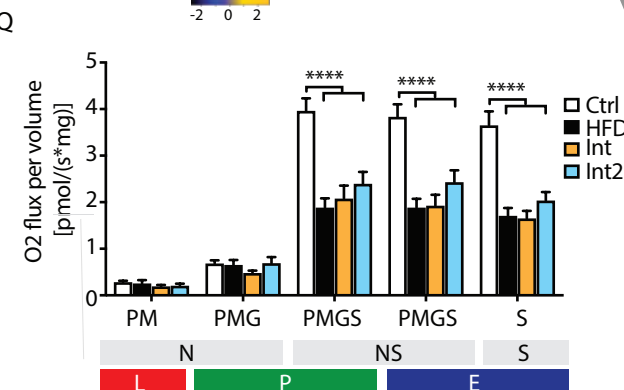

O

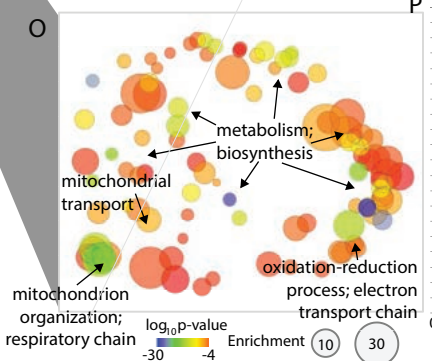

P

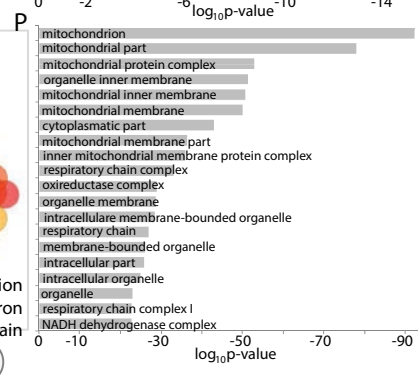

Figure 5.

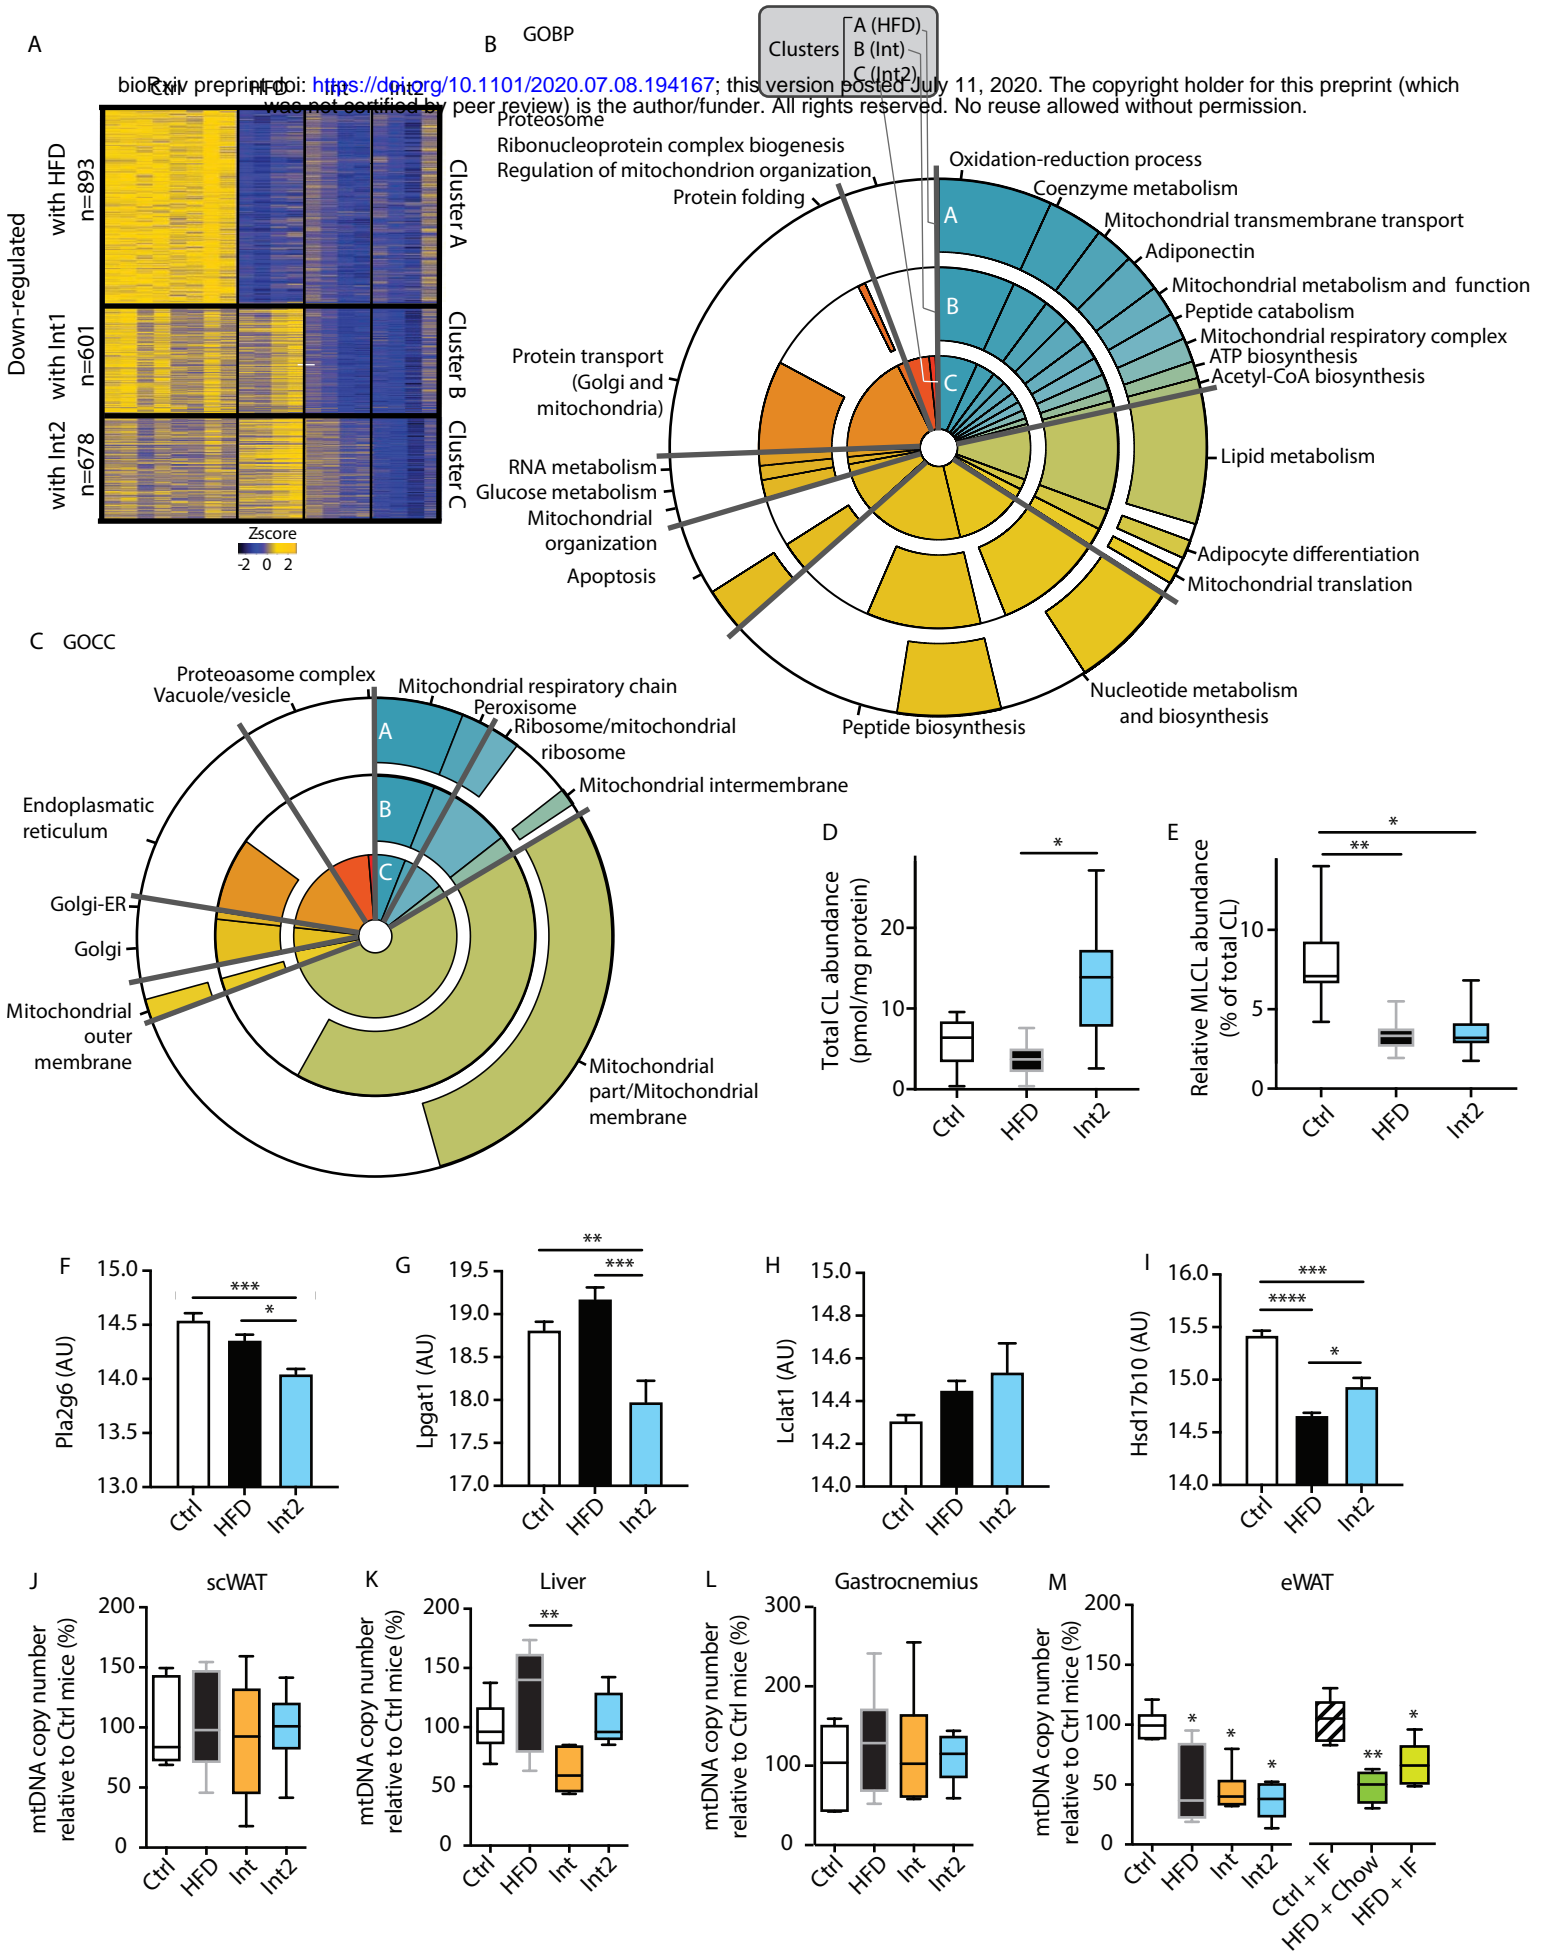

bioRxiv preprint doi: <https://doi.org/10.1101/2020.07.08.194167>; this version posted July 11, 2020. The copyright holder for this preprint (which was not certified by peer review) is the author/funder. All rights reserved. No reuse allowed without permission.

## Supplementary information

**Supplementary Figure 1.** A: Insulin tolerance test in fasted mice (Ctrl n=9; HFD n=6; Int n=6). B: Beta-cell size distribution per pancreas area (Ctrl n=6; HFD n=4; Int n=4). Data represented as mean  $\pm$  SEM, ANOVA One-way and Post-hoc Tukey, \*p<0.05, \*\*p<0.01, \*\*\*p<0.001, and \*\*\*\*p<0.0001.

**Supplementary Figure 2.** A: Detailed representation of Figure 2A uncovering sub-patterns within each group. Different colors indicate the different sub-patterns (in FigureS2A) that correspond to patterns (in Figure 2A). Patterns are grouped in 4 different colors for Figure 2A for simplification. A crossing pattern in Figure S2A indicates no transitivity property, in 3 scenarios: Ctrl vs HFD with no statistical difference, Ctrl vs Int with no statistical difference, but HFD vs Int with a statistical difference (Ctrl $\approx$ HFD, Ctrl $\approx$ Int, HFD $\neq$ Int); when Ctrl $\approx$ HFD, Ctrl $\neq$ Int, HFD $\approx$ Int; and when Ctrl $\neq$ HFD, Ctrl $\approx$ Int, HFD $\approx$ Int.

**Supplementary Figure 3.** A: Gene ontology cellular components (GOCC) enrichment analysis for the 1369 transcripts downregulated in HFD and Int. B: Percentage of mitochondria within the different mitochondrial cristae frequency categories (Ctrl n=3, HFD n=4, Int n=4). C: Mitochondrial aspect ratio (Ctrl n=3, HFD n=4, Int n=4).

**Supplementary Figure 4.** A: Body weight evolution in the 4 experimental groups. B: Intraperitoneal glucose tolerance test (IGTT) (Ctrl n=82, HFD n=168, Int n=32, Int2 n=19). C: Quantification for Caspase3- and Mac2-positive cells staining in eWAT for each experimental group (Figure 4D) (Ctrl n=3-4, HFD n=4, Int n=3-4, Int2 n=4-5). D and E: Vegfa (c) and Vegfr (d) normalized eWAT gene expression (Ctrl n=8, HFD n=4, Int n=4, Int2 n=4). Ctrl: control;

HFD: high fat diet-fed; Int: intervention; Int2: second intervention. Data represented as mean  $\pm$  SEM, ANOVA One-way and Post-hoc Tukey, significant differences with respect to Ctrl  
\* $p < 0.05$ , \*\* $p < 0.01$ , \*\*\* $p < 0.001$ , and \*\*\*\* $p < 0.0001$ .

Figure S1.

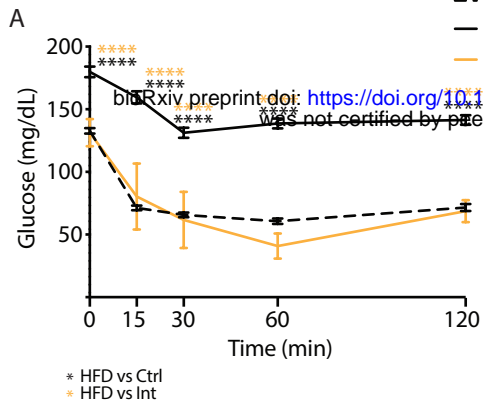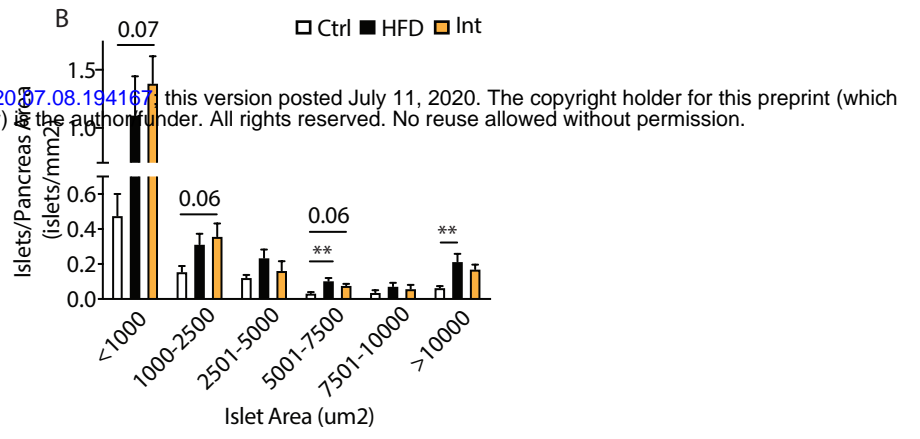

Figure S2.

A

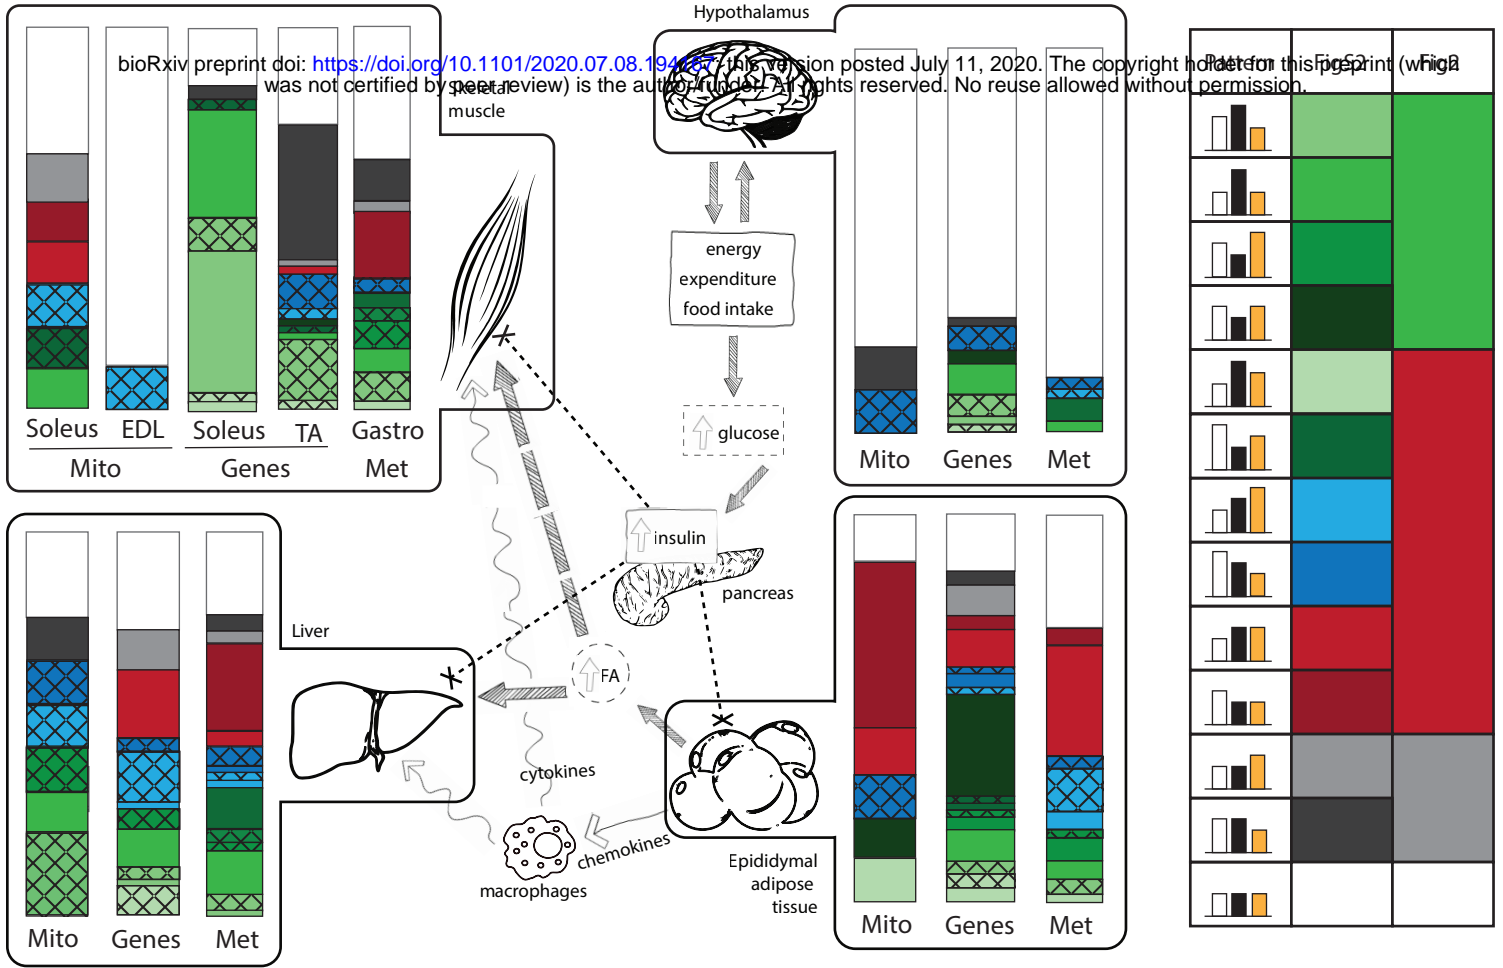



Figure S3.

A

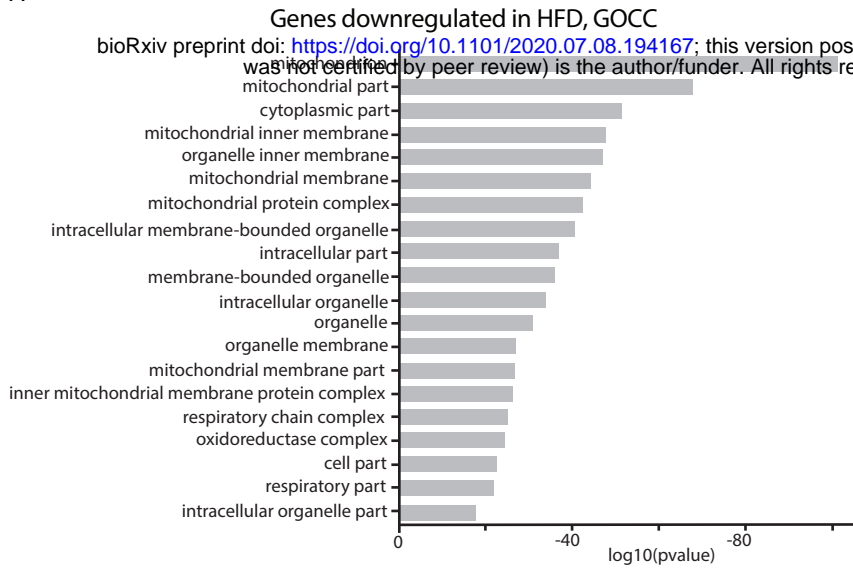

B

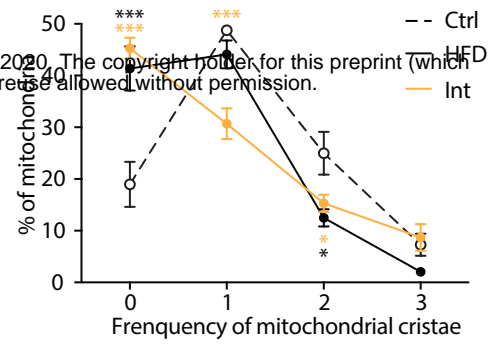

C

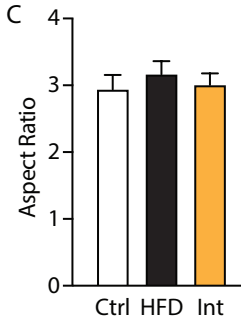

Figure S4.

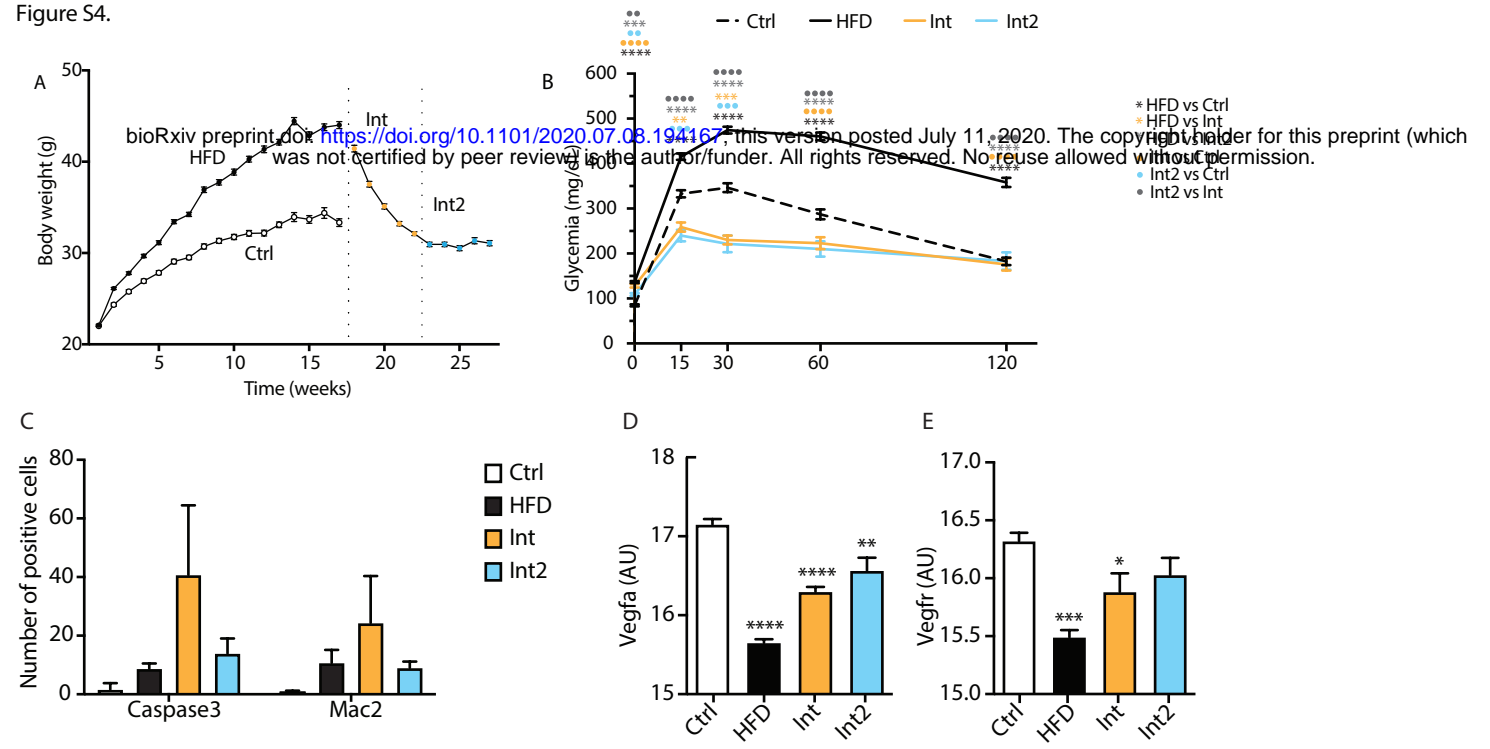

## **Supplementary Tables 1-7:**

<http://resources.idibaps.org/paper/obesity-triggers-a-progressive-mitochondrial-deterioration-in-white-adipose-tissue-even-after-a-lifestyle-mediated-phenotypic-reversion>

**Supplementary Table 1.** Gene expression: Gene expression by RT-PCR in the different tissues and experimental groups (corresponding to Figure 2).

<https://drive.google.com/open?id=1wArleHoqkSYAnjBa2pRruNz9ytSfG15T>

**Supplementary Table 2.** Gene expression: Gene expression by RNA-seq in the different tissues and experimental groups (corresponding to Figures 2-4).

<https://drive.google.com/open?id=1hyla2k2TEFf3zEohlzQRfCnFaCMxGamr>

**Supplementary Table 3.** Metabolomics: Metabolic data for the different tissues and experimental groups (corresponding to Figure 2).

[https://drive.google.com/open?id=17hULD46zDsrPFnDdH1sYFfTafW\\_A7MQ](https://drive.google.com/open?id=17hULD46zDsrPFnDdH1sYFfTafW_A7MQ)

**Supplementary Table 4.** Mitochondria function: High-resolution respirometry of the different tissues and experimental groups (corresponding to Figures 2-4).

[https://drive.google.com/open?id=1D39FCgM3-npu-CZq\\_ZLTwNn-h8pN05OZ](https://drive.google.com/open?id=1D39FCgM3-npu-CZq_ZLTwNn-h8pN05OZ)

**Supplementary Table 5.** Cardiolipidomics: Cardiolipin analysis by liquid chromatography with mass spectrometry for the different experimental groups (Corresponding to Figure 5).

[https://drive.google.com/open?id=1rcE8PfkhevjLB5\\_wRJEeFyznjh4q\\_1WJ](https://drive.google.com/open?id=1rcE8PfkhevjLB5_wRJEeFyznjh4q_1WJ)

**Supplementary Table 6.** Gene ontologies of genes irreversibly decreased with HFD-feeding: Gene ontology biological processes enrichment analysis in the clusters of genes irreversibly decreased with HFD-feeding; from the first intervention and from the second intervention (corresponding to Figure 5).

[https://drive.google.com/open?id=1zgEHbjyZvl\\_ux4Vld7zTeAnKXzH\\_9JHI](https://drive.google.com/open?id=1zgEHbjyZvl_ux4Vld7zTeAnKXzH_9JHI)

**Supplementary Table 7.** Gene ontologies of genes irreversibly decreased with HFD-feeding: Gene ontology cellular compartments enrichment analysis in the clusters of genes irreversibly decreased with HFD-feeding; from the first intervention and from the second intervention (corresponding to Figure 5).

[https://drive.google.com/open?id=1z9VmKXBxGEgiwB3KbOtQ4SyKc\\_ZF5LMY](https://drive.google.com/open?id=1z9VmKXBxGEgiwB3KbOtQ4SyKc_ZF5LMY)

**Supplementary Table 8.** Antibodies, TaqMan probes and mitochondrial substrates, uncoupler and inhibitors (Mitochondrial High-Resolution Respirometry).

|                                                                          | Source            | Reference |
|--------------------------------------------------------------------------|-------------------|-----------|
| <b>Antibodies</b>                                                        |                   |           |
| Polyclonal Rabbit Anti-Human Glucagon antibody, 1:1000                   | Dako / Agilent    | A0565     |
| Polyclonal Guinea Pig Anti- Insulin antibody, 1:1000                     | Dako / Agilent    | A0564     |
| Donkey Anti-Rabbit IgG (H+L) Antibody, Alexa Fluor 488 Conjugated, 1:500 | Life Technologies | A21206    |
| Goat Anti-Guinea Pig IgG Antibody, Alexa Fluor 555 Conjugated, 1:500     | Life Technologies | A21435    |
| Mouse Anti-OPA1 Monoclonal Antibody, Unconjugated, Clone 18, 1:1000      | BD Biosciences    | 612606    |

|                                                                                                                                                                    |                           |               |
|--------------------------------------------------------------------------------------------------------------------------------------------------------------------|---------------------------|---------------|
| Rat Anti-Mouse MAC-2 and Gal-3 (Galectin-3) Monoclonal antibody, Unconjugated, Clone m3/38, 1:40000                                                                | CEDARLANE                 | CL8942AP      |
| Cleaved Caspase-3 (Asp175) (5A1E) Rabbit mAb antibody, 1:500                                                                                                       | Cell Signaling Technology | 9664          |
| Isolectin GS-IB <sub>4</sub> From Griffonia simplicifolia, Alexa Fluor™ 568 Conjugate, 1:2000                                                                      | Invitrogen                | I21412        |
| DAPI                                                                                                                                                               |                           |               |
| High-resolution respirometry: substrates, inhibitors and uncoupler                                                                                                 |                           |               |
| L-Glutamic acid, sodium salt, C <sub>5</sub> H <sub>8</sub> NO <sub>4</sub> Na                                                                                     | Sigma                     | G1626         |
| L-Malic acid, C <sub>4</sub> H <sub>6</sub> O <sub>5</sub>                                                                                                         | Sigma                     | M1000         |
| Pyruvic acid sodium salt, C <sub>3</sub> H <sub>3</sub> O <sub>3</sub> Na                                                                                          | Sigma                     | P2256         |
| Succinate disodium salt, hexahydrate, C <sub>4</sub> H <sub>4</sub> O <sub>4</sub> Na <sub>2</sub> x 6 H <sub>2</sub> O                                            | Sigma                     | S2378         |
| Cytochrome c                                                                                                                                                       | Sigma                     | C7752         |
| Adenosine 5'diphosphate, C <sub>10</sub> H <sub>15</sub> N <sub>5</sub> O <sub>10</sub> P <sub>2</sub> K, potassium salt, contains 1 mol/mol H <sub>2</sub> O, ADP | Sigma                     | A5285         |
| Carbonyl cyanide p- (trifluoro-methoxy) phenyl-hydrazone C <sub>10</sub> H <sub>5</sub> F <sub>3</sub> N <sub>4</sub> O, FCCP                                      | Sigma                     | C2920         |
| Antimycin A                                                                                                                                                        | Sigma                     | A8674         |
| Rotenone, C <sub>23</sub> H <sub>22</sub> O <sub>6</sub>                                                                                                           | Sigma                     | R8875         |
| Taqman® probes                                                                                                                                                     |                           |               |
| acetyl-Coenzyme A carboxylase alpha                                                                                                                                | Acaca                     | Mm01304257_m1 |
| adhesion G protein-coupled receptor E1                                                                                                                             | Adgre1                    | Mm00802529_m1 |
| agouti related neuropeptide                                                                                                                                        | Agrp                      | Mm00475829_g1 |
| activating transcription factor 4                                                                                                                                  | Atf4                      | Mm00515324-m1 |
| activating transcription factor 6                                                                                                                                  | Atf6                      | Mm01295317-m1 |
| ATP synthase, H <sup>+</sup> transporting, mitochondrial F1 complex, alpha subunit 1                                                                               | Atp5a1                    | Mm00431960-m1 |
| CART prepropeptide                                                                                                                                                 | Cartpt                    | Mm04210469_m1 |
| catalase                                                                                                                                                           | Cat                       | Mm00437992-m1 |

|                                                                             |        |               |
|-----------------------------------------------------------------------------|--------|---------------|
| chemokine (C-C motif) ligand 2                                              | Ccl2   | Mm00441242_m1 |
| CD209e antigen                                                              | Cd209e | Mm00459980_m1 |
| CD68 antigen                                                                | Cd68   | Mm00839636_g1 |
| cell death-inducing DNA fragmentation factor, alpha subunit-like effector A | Cidea  | Mm00432554_m1 |
| caseinolytic mitochondrial matrix peptidase chaperone subunit               | Clpx   | Mm00488586_m1 |
| cytochrome c oxidase subunit IV isoform 1                                   | Cox4i1 | Mm01250094-m1 |
| carnitine palmitoyltransferase 1a, liver                                    | Cpt1a  | Mm00550438-m1 |
| corticotropin releasing hormone                                             | Crh    | Mm01293920_s1 |
| citrate synthase                                                            | Cs     | Mm00466043-m1 |
| DNA-damage inducible transcript 3                                           | Ddit3  | Mm00492097_m1 |
| diacylglycerol O-acyltransferase 2                                          | Dgat2  | Mm00499536_m1 |
| dynamamin 1-like                                                            | Dnm1l  | Mm01342903_m1 |
| estrogen related receptor, alpha                                            | Esrra  | Mm00433143-m1 |
| fatty acid synthase                                                         | Fasn   | Mm00662319-m1 |
| fibroblast growth factor 1                                                  | Fgf1   | Mm00438906_m1 |
| fibroblast growth factor 21                                                 | Fgf21  | Mm00840165_g1 |
| fission 1 (mitochondrial outer membrane)                                    | Fis1   | Mm00481580_m1 |
| forkhead box O1                                                             | Foxo1  | Mm00490672_m1 |
| GA repeat binding protein, alpha                                            | Gabpa  | Mm00484598-m1 |
| glyceraldehyde-3-phosphate dehydrogenase                                    | Gapdh  | Mm99999915_g1 |
| glutathione peroxidase 1                                                    | Gpx1   | Mm00656767-g1 |
| glycogen synthase 1, muscle                                                 | Gys1   | Mm01962575_s1 |
| glycogen synthase 2                                                         | Gys2   | Mm00523953_m1 |
| hepatic nuclear factor 4, alpha                                             | Hnf4a  | Mm01247716_m1 |
| heat shock protein 5                                                        | Hspa5  | Mm00517691-m1 |
| heat shock protein 9                                                        | Hspa9  | Mm00477716_g1 |
| heat shock protein 1 (chaperonin)                                           | Hspd1  | Mm00849835_g1 |
| interleukin 10                                                              | IL10   | Mm00439614_m1 |
| interleukin 1 beta                                                          | IL1b   | Mm00434228_m1 |

|                                                                       |          |               |
|-----------------------------------------------------------------------|----------|---------------|
| interleukin 6                                                         | IL6      | Mm00446190_m1 |
| integrin alpha X                                                      | Itgax    | Mm00498698_m1 |
| leptin receptor                                                       | Lepr     | Mm00440181_m1 |
| lon peptidase 1, mitochondrial                                        | Lonp1    | Mm01236887_m1 |
| lipoprotein lipase                                                    | Lpl      | Mm00434764_m1 |
| melanocortin 3 receptor                                               | Mc3r     | Mm00434876_s1 |
| melanocortin 4 receptor                                               | Mc4r     | Mm00457483_s1 |
| mitofusin 1                                                           | Mfn1     | Mm00612599_m1 |
| mitofusin 2                                                           | Mfn2     | Mm00500120_m1 |
| mitochondrially encoded cytochrome c oxidase I                        | mt-Co1   | Mm04225243_g1 |
| mitochondrially encoded cytochrome b                                  | mt-Cytb  | Mm04225271_g1 |
| mitochondrially encoded NADH dehydrogenase 3                          | mt-Nd3   | Mm04225292_g1 |
| NADH dehydrogenase (ubiquinone) 1 alpha subcomplex, 9                 | Ndufa9   | Mm00481216-m1 |
| nicotinamide N-methyltransferase                                      | Nnmt     | Mm00447994_m1 |
| neuropeptide Y                                                        | Npy      | Mm00445771_m1 |
| nuclear respiratory factor 1                                          | Nrf1     | Mm00447996_m1 |
| optic atrophy 1                                                       | Opa1     | Mm00453879_m1 |
| phosphoenolpyruvate carboxykinase 1, cytosolic                        | Pck1     | Mm00440636_m1 |
| phosphofructokinase, liver, B-type                                    | Pfkl     | Mm00435587_m1 |
| phosphofructokinase, muscle                                           | Pfkm     | Mm01309576_m1 |
| pro-opiomelanocortin-alpha                                            | Pomc     | Mm00435874_m1 |
| peroxisome proliferator activated receptor alpha                      | Ppara    | Mm00440939_m1 |
| peroxisome proliferator activator receptor delta                      | Ppard    | Mm00803184-m1 |
| peroxisome proliferator activated receptor gamma                      | Pparg    | Mm00440945_m1 |
| peroxisome proliferative activated receptor gamma coactivator 1 alpha | Ppargc1a | Mm01208835-m1 |
| peroxisome proliferative activated receptor gamma coactivator 1 beta  | Ppargc1b | Mm01258518_m1 |
| peptidylprolyl isomerase A                                            | Ppia     | Mm02342430_g1 |
| stearoyl-Coenzyme A desaturase 1                                      | Scd1     | Mm01197142-m1 |

|                                                                     |        |               |
|---------------------------------------------------------------------|--------|---------------|
| succinate dehydrogenase complex, subunit A, flavoprotein (Fp)       | Sdha   | Mm01352366-m1 |
| solute carrier family 2 (facilitated glucose transporter), member 2 | Slc2a2 | Mm00446224_m1 |
| solute carrier family 2 (facilitated glucose transporter), member 4 | Slc2a4 | Mm00436615_m1 |
| suppressor of cytokine signalling 3                                 | Socs3  | Mm00545913_s1 |
| superoxide dismutase 2, mitochondrial                               | Sod2   | Mm01313000-m1 |
| sterol regulatory element binding transcription factor 1            | Srebf1 | Mm00550338_m1 |
| transcription factor A, mitochondrial                               | Tfam   | Mm00447485-m1 |
| tumor necrosis factor                                               | Tnf    | Mm00443258_m1 |
| ubiquitin-like 5                                                    | Ubl5   | Mm01151181_m1 |
| uncoupling protein 1 (mitochondrial, proton carrier)                | Ucp1   | Mm00494069_m1 |
| uncoupling protein 2 (mitochondrial, proton carrier)                | Ucp2   | Mm00627599_m1 |
| uncoupling protein 3 (mitochondrial, proton carrier)                | Ucp3   | Mm00494077_m1 |
| ubiquinol cytochrome c reductase core protein 2                     | Uqcrc2 | Mm00445961-m1 |
| X-box binding protein 1 spliced                                     | Xbp1sp | Mm03464496_m1 |
| X-box binding protein 1 total                                       | Xbp1t  | Mm00457357_m1 |
